1     **An Environmental Restriction impairs HIV-1 virion fusion and triggers**  
2                                   **innate immune recognition**

3  
4             **Samy Sid Ahmed<sup>a</sup>, Liv Zimmerman<sup>b</sup>, Andrea Imle<sup>a</sup>, Katrin Wuebben<sup>c</sup>, Nadine**  
5             **Tibroni<sup>a</sup>, Lena Rauch-Wirth<sup>d</sup>, Jan Münch<sup>d</sup>, Petr Chlanda<sup>b</sup>, Frederik Graw<sup>c,f,g</sup> and**  
6             **Oliver T. Fackler<sup>a,e,#</sup>**

7  
8  
9     <sup>a</sup> Department of Infectious Diseases, Integrative Virology, CIID, Heidelberg University,  
10        Medical Faculty Heidelberg, Heidelberg, Germany

11    <sup>b</sup> Schaller Research Groups, Department of Infectious Diseases, Virology, Heidelberg  
12        University, Medical Faculty Heidelberg, 69120 Heidelberg, Germany

13    <sup>c</sup> BioQuant-Center for Quantitative Biology, Heidelberg University, 69120 Heidelberg,  
14        Germany

15    <sup>d</sup> Institute of Molecular Virology, Ulm University Medical Center, 89081 Ulm, Germany

16    <sup>e</sup> German Centre for Infection Research (DZIF), Partner Site Heidelberg, Germany

17    <sup>f</sup> Interdisciplinary Center for Scientific Computing, Heidelberg University, 69120 Heidelberg,  
18        Germany

19    <sup>g</sup> Friedrich-Alexander-Universität Erlangen-Nürnberg, Department of Medicine 5, 91054  
20        Erlangen, Germany

21  
22    Running title: TLR sensing by extracellular matrix

23    # Corresponding author at:

24    Department of Infectious Diseases, Integrative Virology, University Hospital Heidelberg, Im

25    Neuenheimer Feld 344, 69120 Heidelberg, Germany Phone: ++49-(0)6221-561322; Fax:

26    ++49-(0)6221-565003; Email: [oliver.fackler@med.uni-heidelberg.de](mailto:oliver.fackler@med.uni-heidelberg.de)

27 **Abstract**

28 In vivo, HIV-1 replicates within 3D tissues, yet the impact of tissue-like environments on  
29 viral spread is largely unknown. Our previous research identified that synthetic 3D  
30 environments impose an *Environmental Restriction to cell-free Virus Infectivity* (ERVI) that  
31 diminishes HIV-1 particle infectivity. Here, mechanistic studies reveal that ERVI is  
32 implemented within minutes, saturable and induced by different adhesive tissue-like 3D  
33 matrices. ERVI reduces infectivity across a wide range of primary HIV-1 strains and virions  
34 bearing distinct viral glycoproteins but does not damage virion morphology or affect their  
35 binding to target cells. Rather, ERVI impairs virion fusion with target cells and infectivity  
36 enhancing peptide nanofibrils can restore efficient infection. In addition, ERVI sensitizes  
37 HIV-1 particles for recognition by monocyte-derived macrophages via toll-like receptors 4  
38 and 8, triggering pronounced pro-inflammatory cytokine secretion. These results suggest that  
39 ERVI represents a broadly acting, tissue-intrinsic barrier to virus spread that reduces the  
40 fusogenicity of cell-free virions and sensitizes them for innate immune recognition.

41 **Key words:** HIV-1, tissue-like 3D environments, collagen, virion infectivity restriction,  
42 innate immune sensing

43

44

## 45 **Introduction**

46 Many viruses including Human Immunodeficiency Virus (HIV) can spread from infected  
47 donor cells either by the release of cell-free particles into the extracellular space that then  
48 diffuse to new target cells (cell-free transmission) or via close physical contacts between  
49 donor and target cell (cell-associated transmission) (Hubner *et al*, 2009; Jolly *et al*, 2004;  
50 Phillips, 1994). In the case of HIV, cell-associated transmission occurs at highly polarized  
51 cell-cell contacts referred to as virological synapse and in cell culture models, this  
52 transmission mode is significantly more efficient than infections by cell-free virus particles  
53 (Dimitrov *et al*, 1993; Iwami *et al*, 2015; Kolodkin-Gal *et al*, 2013; Sourisseau *et al*, 2007).  
54 Virological synapses have been documented in small animal models for HIV but also murine  
55 leukemia virus (Murooka *et al*, 2012; Sewald *et al*, 2015), but which transmission mode  
56 predominates in infected tissue remained unclear. To start addressing this problem, we  
57 previously established three dimensional (3D) collagen matrices as a tissue-like cell culture  
58 model in which parameters such as cell density and 3D organization can be controlled  
59 (Ahmed *et al*, 2020; Imle *et al*, 2019). At conditions of limited cell density where virions  
60 either need to diffuse or donor cells have to migrate to new target cells to sustain HIV spread,  
61 computational modelling and subsequent experimental validation identified cell-associated  
62 transmission as the predominant mode of virus spread in 3D collagen. Under such conditions,  
63 motility was found to be a relevant parameter for target cells' permissivity for infection  
64 (Lopez *et al*, 2022). In contrast, in 3D collagen with very high cell density or in classical  
65 suspension cultures, cell-free and cell-associated transmission modes supported HIV-1 spread  
66 with comparable efficacy. This shift towards cell-associated virus transmission in tissue-like  
67 environments reflected an enhanced efficiency of cell-associated spread, but also a significant  
68 reduction of the infectivity of HIV-1 particles. Imaging analysis revealed that HIV-1 particles  
69 freely diffuse in the tissue-like environment but undergo short (milliseconds) and reversible  
70 physical interactions with collagen fibers. These findings suggested that in tissue, the physical

71 contact with extracellular matrix limits the infectivity of cell-free HIV-1 particles. In analogy  
72 to intracellular barriers that counteract HIV-1 spread, such as host cell restriction factors as  
73 part of the cell intrinsic immune system, we refer to this tissue intrinsic phenomenon as  
74 *Extracellular Restriction of Virion Infectivity* (ERVI).

75 As an enveloped virus particle, the infectious potential of HIV-1 virions is determined by a  
76 large number of parameters. This comprises basic properties such as particle integrity,  
77 packaging of the viral genome and essential enzymes, incorporation of the viral glycoprotein  
78 Env, and liquid-order membrane microdomain-like lipid composition of the viral envelope  
79 (Brügger *et al*, 2006; Nieto-Garai *et al*, 2021; Sáez-Cirión *et al*, 2002; Yi *et al*, 2006).  
80 Reflecting this complex set of requirements for the generation of an infectious HIV particle, a  
81 wide range of cellular restriction factors including tetherin, SERINC proteins, 90K, IFTIM  
82 proteins, GBP 2 and 5 and PSGL-1 reduce HIV-1 infectivity via distinct mechanisms (Braun  
83 *et al*, 2019; Krapp *et al*, 2016; Liu *et al*, 2019; Lodermeier *et al*, 2013; Neil *et al*, 2008; Rosa  
84 *et al*, 2015; Usami *et al*, 2015; Venkatesh & Bieniasz, 2013). In this study, we set out to gain  
85 more insight into the mechanism and functional consequences of ERVI.

86

87



## 88 **Results**

### 89 **ERVI is a rapidly induced, saturable and conserved restriction to HIV-1 infectivity**

90 Our previous results had established that tissue-like 3D collagen environments pose the ERVI  
91 barrier that markedly reduces the infectivity of HIV-1 particles recovered from the  
92 supernatant of 3D collagen matrices in which virus producing cells or cell-free virus particles  
93 had been embedded (Imle *et al.*, 2019). Single particle tracking revealed that HIV virions  
94 diffuse freely in the 3D matrix but undergo physical contacts with collagen fibers. These  
95 interactions were transient in the millisecond range and did not result in coating of the fibers  
96 with virus particles (Imle *et al.*, 2019). Since physical stress can impair virus infectivity by  
97 inducing shedding of the viral glycoprotein from the virion, and the efficacy of glycoprotein  
98 incorporation is an important determinant of infectivity (Chertova *et al.*, 2002; Day *et al.*,  
99 2004) we first tested if contact with 3D collagen alters the amounts of the HIV-1 glycoprotein  
100 Env in these particles. However, Env protein levels were comparable between virions cultured  
101 in suspension or in 3D collagen (EV 1A, B). To gain more insight into the nature of ERVI, we  
102 conducted a kinetic analysis and compared the impact of culturing HIV-1 NL4.3 particles in  
103 suspension or in 3D collagen with different densities (dense: 3 mg/ml; loose: 1.6 mg/ml) (Fig.  
104 1A). Virion infectivity was assessed on Tzm-bl reporter cells, in which the luciferase gene is  
105 under control of the HIV-1 promoter and de novo expression of the viral transactivator Tat in  
106 productively infected cells triggers luciferase expression. The amount of luciferase expression  
107 relative to the amounts of virus used for infection, as determined by quantifying the activity of  
108 viral reverse transcriptase by the SG-PERT assay, yielded the relative infectivity of HIV  
109 particles. In line with our previous findings, single rounds of infection revealed that culturing  
110 HIV-1 in dense or loose 3D collagen for 16h reduced their infectivity to 10.6% or 14.3% of  
111 the particles from parallel suspension cultures (Fig. 1B). Kinetic analysis revealed that  
112 infectivity was reduced immediately or within 4h after contact with dense 3D collagen in

113 dense and loose collagen, respectively. The subsequent reduction of the remaining virion  
114 infectivity over time followed comparable kinetics under all culture conditions (Fig. 1C).

115 To assess how conserved the sensitivity to ERVI is among primary lentiviruses, we  
116 next analyzed the impact of 3D collagen on a panel of lab-adapted and primary HIV-1 strains  
117 as well as one HIV-2 strain on Tzm-bl reporter cells (Fig. 1D). The results revealed that the  
118 infectivity of all HIV strains tested was significantly reduced by ERVI, but to varying  
119 magnitude ranging from strong (52.9 fold, HIV-1 ADA, dense collagen) to very mild  
120 inhibition (1.6 fold, HIV-1 RHGA, loose collagen). The reduction of infectivity by ERVI was  
121 independent of the HIV-1 entry co-receptor preference but patient-derived transmitted  
122 founder and chronic HIV-1 variants tended to be less sensitive to ERVI than lab-adapted  
123 HIV-1. Notably, also HIV-1 virions lacking Env but pseudotyped with the glycoprotein of  
124 vesicular stomatitis virus (VSVG) were sensitive to ERVI. To analyze further the impact of  
125 the viral glycoprotein for the sensitivity to ERVI, we pseudotyped GFP encoding lentiviral  
126 particles with the unrelated glycoproteins of the HCV isolates Con1 or JFH1 and tested their  
127 infectivity on Huh 7.5 cells by flow cytometry-based quantification of GFP expressing cells  
128 (Fig. 1E). While the infectivity of these virions was also reduced, the effects were moderate  
129 and only reached statistical significance for particles pseudotyped with JFH1 glycoprotein in  
130 dense collagen. The analysis of lentiviruses pseudotyped with the Influenza HA or the Ebola  
131 virus glycoproteins was not informative since already 16h culture in suspension reduced the  
132 infectivity of these particles below the detection limit (EV 1C,D). Together, these results  
133 suggest that the viral glycoprotein is a key determinant for the sensitivity to ERVI. Reduction  
134 of virus infectivity is observed with glycoproteins of different receptor specificity and  
135 topology but type I (HIV) and type III (VSVG) glycoproteins may be more sensitive to ERVI  
136 than type II glycoproteins (HCV).

137 Since cellular restrictions to virus infection typically act as physical barriers that can  
138 be overcome by an excess of virus particles, we analyzed if the amounts of virions added to a

139 constant culture volume affected the magnitude of reduction in virion infectivity (Fig. 1F).  
140 While the relative infectivity of virus particles in suspension was unaffected by the  
141 concentration of virus, the infectivity reduction by ERVI was significantly less efficient at  
142 higher virus concentrations in dense or loose collagen (Fig. 1F; relative infectivity 7- or 2-fold  
143 higher at  $10^7$  vs.  $10^5$  BCUs in dense or loose collagen;  $p < 0.09$  and  $p < 0.015$  respectively).

144 We next sought to define how the architecture and biophysical properties of the 3D  
145 matrix affect its ability to reduce the infectivity of HIV-1 virions and compared several  
146 matrices that (i) can be polymerized without harming *per se* the infectivity of HIV particles  
147 (e.g. high temperature or UV exposure) and (ii) result in pore size that allows HIV-1 particles  
148 to diffuse within and out of the 3D matrix (Fig. 1G, EV 1E). The dense and loose collagen  
149 matrices are assembled into fibers polymerized from purified type I collagen proteins, the  
150 most abundant collagen type in tissue. Confocal reflection microscopy analysis of these  
151 matrices confirmed the different density of both types of type I collagens after polymerization  
152 and revealed that the dense collagen was enriched in branched collagen bundles (EV 1E).  
153 Similarly, the architecture of 3D matrices made of type III collagen, the second most  
154 abundant fibrillary collagen in tissue that is synthesized by reticular cells and lines e.g.  
155 vasculature, resembled that of dense collagen, albeit with shorter and thinner collagen  
156 bundles, and type III collagen reduced HIV-1 infectivity with similar efficacy. We also tested  
157 Matrigel, a complex extracellular environment of the basal membrane rich in collagen I as  
158 model for type I collagen fibers in a complex tissue environment. Matrigel assembles into 3D  
159 matrices with higher pore sizes and heterogeneity than purified collagen matrices (Anguiano  
160 *et al*, 2020). Although matrigel displayed a punctate morphology, its antiviral activity was  
161 comparable to that of dense collagen (24.1 $\pm$  4.4% of suspension or 4-fold reduction). In  
162 contrast, agarose hydrogels, which are made of bundles of linear filaments without cell  
163 adhesion features, did not impair the infectivity of HIV-1 virions.

164 Together, these results reveal that a broad range of HIV-1 variants are sensitive to  
165 ERVI. This extracellular restriction is exerted rapidly upon contact with the 3D environment,  
166 can be saturated by excess of virus particles, and is exerted by a variety of adhesive  
167 extracellular matrix components.

168

### 169 **ERVI restricts HIV-1 infectivity without affecting structural integrity of virus particles**

170 We next addressed in more detail how the physical contact of HIV particles with the 3D  
171 collagen environment affects their infectivity. We considered the possibility that following  
172 transient contacts of HIV-1 particles with collagen fibers, collagen material remains attached  
173 to the virions and compromises their infectivity. Embedding of HIV-1 particles in  
174 fluorescently labelled collagen (EV 2A), which exerted ERVI with similar efficacy than non-  
175 labelled collagen (Fig. 2A), resulted in a small population of fluorescent HIV-1 particles  
176 (8.5+/-4.7 %, Fig. 2B, C). However, these events were not frequent enough to explain the  
177 over 10-fold reduction in infectivity observed. To assess potential physical damage of the  
178 virions, we next analyzed their morphology by cryo-electron tomography. HIV-1 particles  
179 kept in suspension or in dense or loose 3D collagen were placed on EM grids and processed  
180 for cryo-ET analysis. Under all three conditions, enveloped HIV-1 particles with the typical  
181 conical core and a diameter ranging from 104 to 154 nm (mean values: suspension: 134.5+/-  
182 11.5 nm, dense: 135.2 +/- 9.6nm, loose: 132.0 +/- 11.6 nm) were observed (Fig. 2D, E). All  
183 analyzed particles appeared intact without appreciable membrane rupture or deformation and  
184 showed sparsely distributed Env spikes. We did not observe aberrations in HIV-1 particle  
185 architecture resulting from the interaction with 3D collagen. As size comparison, we also  
186 analyzed the morphology of dense and loose collagen fibers, which displayed the  
187 characteristic structure of collagen fibrils, with a tight packing of D-periodic polyproline type  
188 II helices corresponding to the spacing between individual tropocollagen monomers  
189 (Shoulders & Raines, 2009) (Fig. 2F, EV. 2B). However, none of the images obtained for

190 HIV particles displayed virion-associated material reminiscent of collagen fibers (Fig. 2D),  
191 suggesting that the detection of fluorescent HIV particles after contact with fluorescent 3D  
192 matrices may reflect the transfer of fluorescent dye rather than collagen material. Of note,  
193 incubating HIV-1 particles with the peptide EF-C or RM-8, which boost the infectivity of  
194 HIV-1 particles by enhancing their interaction with target cells (Rauch-Wirth L *et al*, 2023;  
195 Yolamanova *et al*, 2013), increased the infectivity of all particles and almost fully overcame  
196 the inhibitory effect of ERVI (Figs. 2G, H). Together, these results reveal that ERVI does not  
197 result from global disruption of HIV-1 particle architecture and suggest that ERVI does not  
198 affect the intrinsic replication potential of HIV particles but rather the efficacy of their  
199 interaction with target cells.

200

201 **ERVI is manifest at the step of virus fusion to TZM-bl reporter cells without affecting**  
202 **virion binding to target cells**

203 The finding that infection enhancers boost the infectivity of HIV-1 particles subject to ERVI  
204 suggested that ERVI acts at the early step of the viral life cycle. To test if ERVI impairs the  
205 ability of HIV-1 particles to bind to target cells, we generated virions that incorporated  
206 Vpr.mRuby2 during virus production for visualization (Gallucci *et al*, 2023) (Fig. 3A).  
207 Incorporation of Vpr.mRuby2 did not affect their sensitivity to infectivity reduction upon  
208 contact with 3D collagen (Fig. 3B). To visualize their interaction with the surface of Tzm-bl  
209 target cells by spinning disk microscopy, cells were incubated with virus particles for 2h at  
210 4°C to avoid particle internalization and to detect individual fluorescent HIV-1 particles  
211 attached to the cell surface (Fig. 3C, EV 3). While incubating these particles for 16 h in  
212 suspension slightly reduced the number of virions detected at the surface of target cells (Fig.  
213 3D, 2 +/- 0.5 bound virus particles/cell for fresh virus vs. 1.1 +/- 0.4 bound virus particles/cell  
214 for suspension), no additional reduction in binding efficacy was observed for virions that had  
215 been embedded in dense or loose 3D collagen. Notably however, prior contact with dense 3D

216 collagen resulted in significantly larger aggregates of virus particles at the surface of target  
217 cells. Such particle aggregation was not observed upon contact with loose collagen, indicating  
218 that this effect is not essential for ERVI. The predominant action of ERVI therefore is not at  
219 the level of virus binding to target cells.

220 To assess the ability of HIV particles to fuse with target cells membranes, Vpr.Blam  
221 containing particles were produced and used to measure the conversion of the  $\beta$ -lactamase  
222 (BLAM) substrate CCF2 to the cytosol of target cells by flow cytometry as a measure for  
223 fusion (Cavrois *et al*, 2002; Gallucci *et al.*, 2023). The incorporation of Vpr.Blam did not  
224 affect the sensitivity of the virions to ERVI in dense collagen, while the infectivity reduction  
225 by loose collagen was slightly less pronounced (Fig. 4B). Analyzing the fusion capacity of  
226 these particles revealed efficient cytosolic delivery of Vpr.Blam by HIV-1 particles kept in  
227 suspension (10.4 +/- 2.4%), which was dependent on the viral glycoprotein Env and could be  
228 inhibited by the HIV fusion inhibitor T20 (Fig. 4C, D). This fusion capacity was strongly  
229 impaired for particles that had prior contact with dense 3D collagen (1.5 +/- 0.7 %). Loose  
230 collagen (5.4 +/- 2.5%) had a less pronounced effect on the fusion capacity of HIV-1 particles  
231 and overall, infection rates and fusion capacity under the different conditions analyzed were  
232 moderately correlated (Fig. 4E). We conclude that the interaction of HIV-1 particles with  
233 tissue-like environments reduces their infectivity by impairing their ability to fuse with target  
234 cells and that ERVI may also affect additional post entry steps.

235

### 236 **ERVI moderately reduces infection of primary CD4+ T cells and MDMs**

237 HeLa-derived Tzm-bl cells are a convenient and widely used reporter cell to quantify the  
238 infectivity of HIV-1 particles but cannot reflect the differences in entry binding and receptor  
239 densities, membrane lipid composition as well as uptake pathways between different primary  
240 target cells (Choudhry *et al*, 2006). We therefore sought to analyze the relevance of ERVI for  
241 HIV-1 infection of primary human CD4 T cells and primary human monocyte-derived

242 macrophages (MDMs). To be able to use this analysis with the same virus, we employed a  
243 HIV-1 variant that uses CCR5 as entry coreceptor (HIV-1 NL4.3 R5) (Fig. 5A). This co-  
244 receptor tropism did not affect the sensitivity of these particles to ERVI when assessed on  
245 Tzm-bl cells (Fig. 5B), which was again more pronounced in dense than loose collagen.  
246 Productive infection of primary target cells was assessed by quantifying the number of cells  
247 with intracellular p24 capsid by flow cytometry (CD4 T cells, Fig. 5C, MDMs, Fig. 5D). The  
248 reverse transcriptase inhibitor efavirenz (EFZ) was used to define background detection of  
249 input virus. On both CD4 T cells and MDMs, productive infection by particles with prior  
250 contact to dense 3D collagen was significantly reduced (3.6-fold reduction to 27.5% of  
251 suspension on CD4 T cells, 2.9-fold reduction to 34.8% of suspension on MDMs) and loose  
252 collagen only mediated a very mild reduction that did not reach statistical significance (1.8-  
253 fold on CD4 T cells, 1.4-fold on MDMs). These results reveal that ERVI reduces the  
254 infectivity of cell-free HIV-1 particles on primary target cells, albeit with lower efficacy than  
255 on e.g. TZM-bl cells.

256         With 27.5% infectivity remaining, the impact of ERVI on infection of primary CD4 T  
257 cells was less pronounced than on Tzm-bl cells, where ERVI reduces virion infectivity to 14%  
258 of that of virions in suspension culture. Our computational model of HIV-1 replication in 3D  
259 collagen cultures of primary human mononuclear cells, which predicted that cell-associated  
260 virus transmission largely dominates over cell-free infection in 3D collagen matrices (Imle *et*  
261 *al.*, 2019), was based on the value of 14% of cell-free infectivity remaining in 3D. We  
262 therefore asked if the fact that the infectivity of these virions is higher on the primary target  
263 cells present in these 3D cultures affects this conclusion. To this end, we revisited our  
264 previous analyses estimating the efficacy of cell-free and cell-to-cell transmission within  
265 suspension and 3D collagen matrices by mathematical modelling (Imle *et al.*, 2019). Varying  
266 the parameter defining the reduced infectivity of cell-free infection within collagen compared  
267 to suspension, we estimate that the contribution of cell-free transmission to viral transmission



268 within collagen continuously increases with increasing infectivity preservation (Fig. 5E).  
269 Differences between estimates for loose and dense collagen are partly affected by technical  
270 compensations within the fitting procedure due to model constraints, which lead to reduced  
271 estimates of cell-to-cell transmission rates within dense collagen and thereby potentially  
272 underestimating the contribution of cell-to-cell transmission for this environment (EV 4C).  
273 Under these conditions, the best estimates predict that an infectivity reduction to 27.5%  
274 results in a contribution of cell-cell transmission to overall virus spread of 60% and 30% in  
275 loose and dense collagen, respectively. We conclude that in our primary cell 3D cultures, cell-  
276 associated transmission remains an important driver of HIV-1 spread in 3D collagen even if  
277 the infectivity of cell-free particles is less reduced than previously thought.

278

### 279 **ERVI sensitizes virus particles for TLR-mediated recognition by MDMs**

280 We tested next if ERVI has functional implications in MDMs in addition to reducing virion  
281 infectivity. Since MDMs can exhibit efficient innate immune reactions to challenge with HIV  
282 particles (Pierini *et al*, 2021; Rasaiyaah *et al*, 2013; Yin *et al*, 2020), we quantified the  
283 amounts of a panel of cytokines in the supernatant of MDMs 3 days after challenge with HIV-  
284 1 particles kept in suspension or in 3D collagen. Interestingly, prior encounter of HIV-1  
285 particles with tissue-like 3D environments markedly and broadly altered the cytokine  
286 response of MDMs, resulting in increased release of important pro-inflammatory cytokines  
287 such as IL-6, IL-8 and TNF $\alpha$  but also G-CSF, GM-CSF, GRO $\alpha$ , IL-17, IP-10, MCP-3,  
288 CXCL9 and MIP-1 $\alpha/\beta$  (Fig. 6B, compare suspension vs. dense and loose collagen). To gain  
289 insight into the HIV replication intermediate as well as the MDMs sensors that respond to  
290 HIV-1 particles subjected to ERVI, we challenged MDMs with HIV-1 particles derived from  
291 suspension or dense collagen cultures in the presence of selective inhibitors (Fig. 6C).  
292 Interestingly, interfering with virus fusion by the entry inhibitor T20 or with reverse



293 transcription by efavirenz (EFZ) did not impair the ERVI-mediated increase in the secretion  
294 of IL-6 or IL-8 (EV 5A). Entry and early post-entry steps of the HIV-1 life cycle are thus not  
295 required for ERVI-mediated induction of pro-inflammatory cytokine production, suggesting  
296 that innate recognition occurs in the context of non-productive uptake of virus particles. In  
297 line with this scenario, inhibition of the cytoplasmic DNA sensor cGAS had no effect on the  
298 ERVI-mediated induction of IL-6 or IL-8 secretion. Similarly, pharmacological inhibition  
299 suggested that toll-like receptors (TLR) 1/2, 3 and 9 are not involved in the recognition of  
300 ERVI-treated HIV particles. In contrast, inhibiting the endosomal TLR-8 that recognizes  
301 single stranded RNA (Heil *et al*, 2004), or TLR-4, which recognizes bacterial  
302 lipopolysaccharide (LPS) but also viral proteins (Del Cornò *et al*, 2016), or the TLR signaling  
303 adaptor MyD88 (Medzhitov *et al*, 1998) fully abrogated the induction of IL-6 production by  
304 ERVI-treated HIV-1 (Fig. 6C). Inhibition of TLR-8 or MyD88, but not of TLR-4, also  
305 decreased the release of IL-8 by MDMs after challenge with collagen cultured virions (EV  
306 5A). Collectively, these results reveal that ERVI sensitizes HIV-1 particles for recognition by  
307 TLR-8 and -4 in the context of non-productive uptake of HIV-1 particles by MDMs.

## 308 **Discussion**

309 Tissue-like environments shape the mode of HIV-1 spread towards cell-associated  
310 transmission by optimizing duration and architecture of cell-cell contacts but also by  
311 suppressing the infectivity of cell-free virus particles. Investigating the mechanism and  
312 relevance of this intrinsic antiviral property of extracellular environments, ERVI, defined that  
313 this restriction affects the function of a broad range of viral glycoproteins and impairs fusion  
314 but not binding of cell-free virus particles with target cells. Glycoprotein incorporation and  
315 virion morphology are unaffected by ERVI and the restriction can be overcome by using  
316 infectivity enhancing peptide nanofibrils, suggesting that ERVI acts directly on the  
317 fusogenicity of the glycoprotein. This may involve modification of glycoprotein conformation  
318 and/or lipid microenvironment that result from the short physical interaction of virions with  
319 the 3D matrix and may affect the positioning of the glycoprotein in the viral membrane or  
320 their ability to cluster for efficient receptor interactions (Boesze-Battaglia *et al*, 1996;  
321 Chojnacki *et al*, 2012; Watala *et al*, 2002). Viral glycoproteins with differing sensitivity to  
322 ERVI will provide valuable tools for future studies into the molecular mechanism of the  
323 impairment of Env function by ERVI.

324         Assessing the impact of ERVI on MDM target cells revealed a functional consequence  
325 of this extracellular restriction in addition to reducing virion infectivity: HIV particles that  
326 underwent prior contact with tissue-like environments triggered innate immune recognition  
327 resulting in the production of proinflammatory cytokines. Since infection rates of ERVI-  
328 treated HIV particles do not correlate with cytokine production and blocking infection does  
329 not abrogate sensing, ERVI-induced innate sensing of HIV particles does not occur during  
330 productive infection. Rather, the reduced ability to fuse with target cells is likely associated  
331 with increased recognition of particles in a non-productive uptake pathway by TLR-8 and at  
332 the cell surface by TLR-4. Since most HIV particles are subject to non-productive endocytic

333 uptake already in the absence of ERVI (Fackler & Peterlin, 2000; Maréchal *et al*, 1998;  
334 Maréchal *et al*, 2001; Schaeffer *et al*, 2004), we hypothesize that ERVI enhances innate  
335 immune recognition by sorting of particles into an uptake pathway particularly prone to TLR-  
336 8 recognition (Fig. 7). TLR8-mediated sensing of HIV-1 genomes has been reported in a  
337 variety of cell systems and is associated with improved control of HIV replication in patients,  
338 the regulation of latency, and can be exploited by HIV to allow the productive infection of  
339 plasmacytoid dendritic cells (Gringhuis *et al*, 2010; Li *et al*, 2023; Meås *et al*, 2020; Oh *et al*,  
340 2008). The role of TLR-4, which recognizes LPS but also viral proteins at the cell surface  
341 (Chow *et al*, 1999), in HIV-1 infection is less established. However, R5-tropic HIV-1 Env  
342 (Env), Vpr and Tat proteins have been reported to trigger TLR-4 signaling (Bahraoui *et al*,  
343 2020; Del Cornò *et al.*, 2016; Hoshino *et al*, 2010) and in particular for the recognition of  
344 Env, ERVI may potentiate this effect. Increased innate immune recognition is also associated  
345 with the reduction of virion infectivity by the host cell factor SERINC5 (Pierini *et al.*, 2021)  
346 and the capacity of dendritic cells to adapt to tissue-like environments (Gallucci *et al.*, 2023).  
347 Regulation by the extracellular environment thus emerges as an important parameter for  
348 innate immune responses to HIV-1 infection.

349 Our previous computational analysis had identified cell-associated infection as the  
350 predominant HIV-1 transmission mode in 3D cultures (Imle *et al.*, 2019). This conclusion was  
351 based on virion infectivity quantifications on model cell lines and was now questioned by our  
352 experimental finding that the effect of ERVI on infection of primary human CD4 T cells is  
353 less pronounced. Varying the magnitude of infectivity impairment in the model however  
354 revealed that even at these lower levels of cell-free infectivity reduction, cell-associated  
355 infection remains an important transmission mode. This relevant role of cell-associated  
356 transmission likely reflects that the long diffusion times required for virions to reach new  
357 target cells in 3D matrices are associated with significant reduction in their infectivity. This in

358 turn raises the question why the production of large amounts of cell free virus particles is  
359 maintained in lentiviral evolution. The sensitization of non-infectious particles for the  
360 induction of pro-inflammatory cytokine responses by extracellular matrix identified in this  
361 study may be one reason since cytokines such as TNF- $\alpha$ , IL-2, IL-1 and IL-6 can increase the  
362 permissiveness of primary target cells to HIV-1 infection (Foli *et al*, 1995; Maréchal *et al*,  
363 1999; Poli *et al*, 1994; Vyakarnam *et al*, 1990). Although the infection rates of local target  
364 cells are reduced by ERVI, the induced innate recognition may create a replication-prone  
365 tissue microenvironment and thereby indirectly facilitate virus spread in tissue. ERVI is  
366 exerted by 3D collagen from different species that form fibers of distinct architectures,  
367 suggesting that this restriction can be relevant in different HIV target tissues. Notably, chronic  
368 immune activation and inflammation observed in HIV patients even under therapy is  
369 associated with lymph node fibrosis, which is thought to contribute to HIV pathogenesis  
370 (Estes, 2013). Fibrosis reflects the deposition of large amounts of collagen with altered  
371 structural and biophysical properties (Jones *et al*, 2018), which may also impact its antiviral  
372 ERVI activity. Collectively, our study suggests that the reduction of virus particle infectivity  
373 coupled to their enhanced innate immune recognition constitutes a tissue-intrinsic antiviral  
374 immune mechanism. Future studies will focus on the role of ERVI in different fibrotic and  
375 non-fibrotic target tissues as well as in the context of virus-host evolution.

376

### 377 **Limitations:**

378 Our study employed various 3D matrices to define the properties of tissue-like environments  
379 to suppress HIV particle infectivity but this does not assess directly if HIV-1 particles  
380 generated in human tissue are subjected to ERVI. This could in principle be tested with HIV-1  
381 particles derived from organotypic explants models, e.g. tonsil or cervix. However, it is  
382 impossible to ensure that particles produced in such cultures were really produced in densely

383 packed tissue areas and underwent physical contact with tissue fibers. While both dense and  
384 loose collagen exert ERVI, the restriction is less pronounced for loose collagen and further  
385 mechanistic studies will be required to define the molecular basis for this difference.

386 **Materials and Methods:**

387

388 **Cells.** 293T cells (ATCC, CRL-3216) and TZM-bl reporter cells (courtesy of NIH AIDS  
389 Reagent Program (ARP-8129)) were cultured in Dulbecco's Modified Eagle's Medium  
390 (DMEM, Gibco) supplemented with 10% heat-inactivated fetal calf serum (FCS, Capricorn)  
391 and 1% penicillin/streptomycin (Gibco). Huh 7.5 cells were maintained in complete DMEM  
392 medium supplemented with non-essential amino acids.

393

394 **Primary CD4<sup>+</sup> T cells and MDMs.** Human peripheral blood of healthy, HIV-negative  
395 donors was obtained from the blood bank HD, according to regulation by local ethics  
396 committee (S-024/2022). CD4 T cells were isolated from human peripheral blood of healthy,  
397 HIV-negative donors using the RosetteSep Human CD4 T cell enrichment kit (StemCell  
398 Technologies) according to the manufacturer's protocol. The cells were then activated with  
399 Dynabead Human T-Activator CD3/CD28 (Gibco), or in a 3x3 activation as described  
400 previously (Imle *et al.*, 2019)rd

401 for 72h and cultured in Roswell Park Memorial Institute Medium (RPMI, Gibco)  
402 supplemented with 10% heat-inactivated FCS, 1% penicillin–streptomycin, and 10 ng/ml  
403 interleukin 2 (IL-2, Biomol). To generate monocyte-derived macrophages (MDMs),  
404 peripheral blood mononuclear cells (PBMCs) were isolated from buffy coats by Biocoll  
405 (Merck Biochrom) density gradient centrifugation. CD14<sup>+</sup> monocytes were then isolated from  
406 PBMCs by positive selection using magnetic beads (CD14 MicroBeads; Miltenyi Biotech)  
407 and an AutoMACS Pro Separator (Miltenyi Biotech).  $1 \times 10^5$  monocytes per well were then  
408 seeded in glass-bottom 96 well plates that were previously coated with fibronectin (2  $\mu\text{g}/\text{cm}^2$ )  
409 and maintained at 37°C with 5% CO<sub>2</sub> in complete RPMI in the presence of 5% human AB  
410 serum (Sigma-Aldrich) for differentiation into MDMs for 10-14 day (Pierini *et al.*, 2021).

411

412 **Viruses.** Virus stocks of replication competent HIV-1 and HIV-2 strains (pNL4.3 WT,  
413 pNL4.3  $\Delta$ nef, pNL4.3 R5, ADA, CH077, CH0 58.c, CH0198, RHGA, CH0167, CH0293,  
414 HIV-2 Rod9-GFP) were generated by transfecting 293T cells (sub-confluent 15cm<sup>2</sup> dishes)  
415 with 25  $\mu$ g of proviral constructs alongside 75  $\mu$ l of linear polyethyleneimine (PEI, Sigma  
416 Aldrich) in OptiMem medium (Gibco). Viruses containing Vpr-BlaM and Vpr-mRuby2 were  
417 similarly produced by PEI co-transfection of 293T cells using 25  $\mu$ g of pNL4.3 provirus with  
418 7.5  $\mu$ g of Vpr fusion constructs. For single round HIV-1 virus production (pNL4.3  $\Delta$ env  
419 VSVg, pNL4.3  $\Delta$ env HIV-1 Env), 22 $\mu$ g of pNL4.3  $\Delta$ env were used, complemented with 3  $\mu$ g  
420 of the respective glycoprotein expression vectors (Gallucci *et al.*, 2023; Pierini *et al.*, 2021).  
421 Two to three days post transfection, supernatants were harvested, filtered (0.45  $\mu$ m) and  
422 ultracentrifuged through a 20% (w/v) sucrose cushion. Virus pellets were then resuspended in  
423 sterile filtered PBS 0.1% BSA, aliquoted and stored at -80°C. All replication competent  
424 virions were handled in a BSL-3 containment laboratory.

425

426 **Lentiviral pseudotyping.** To generate lentiviral stocks, sub-confluent 293T cultures (15 cm<sup>2</sup>  
427 dishes) were transfected with PEI as described above. Briefly, 22.5  $\mu$ g of pWXPL-GFP  
428 lentiviral backbone were co-transfected alongside 2.3  $\mu$ g of pAdvantage, 15  $\mu$ g packaging  
429 vector Pax 2 and 8  $\mu$ g of envelope glycoprotein encoding plasmids (VSVg, pcDNA Con1,  
430 pcDNA JFH1). Lentiviral vectors carrying Vpx<sub>mac239</sub> were produced in 293 T cells by co-  
431 transfection of pWPI, pcDNA.Vpxmac239, p $\Delta$ R8.9 NSDP, and VSV-G at a molar ratio of  
432 4:1:3:1 as previously described (Pierini *et al.*, 2021). Cell culture supernatants were harvested  
433 and filtered 3 days post transfection, and further concentrated through a 20% (w/v) sucrose  
434 cushion ultracentrifugation. Aliquots were stored at -80°C. Virus titers were determined by  
435 SG-PERT analysis (see below).

436

437 **Plasmids.** The proviral plasmids pNL4.3 WT and  $\Delta$ nef have been previously described  
438 (Fackler *et al.*, 2006). The pNL4.3-R5 WT &  $\Delta$ nef, containing 7 point mutations in the NL4.3  
439 Env were previously described (Bozek *et al.*, 2013; Pierini *et al.*, 2021). The pNL4.3  $\Delta$ env,  
440 and HIV-2 Rod9-GFP proviruses were previously described (Baldauf *et al.*, 2012), provirus  
441 encoding the CCR5 tropic ADA provirus were via the NIH AIDS reagent program (ARP-  
442 416)(Gendelman *et al.*, 1988). All Transmitted/Founder strains were obtained via the NIH  
443 AIDS reagent program (pCR-XL-TOPO CH077 (ARP-11742)(Ochsenbauer *et al.*, 2012),  
444 pCR-XL-TOPO CH058.c (ARP-11856)(Ochsenbauer *et al.*, 2012), pCR-XL-TOPO\_HIV-1  
445 M subtype C CH198 (Parrish *et al.*, 2013). And chronic strains (pBR322 HIV-1 M subtype B  
446 STCO (Mlcochova *et al.*, 2015), pBR322 HIV-1 M subtype B RHGA(ARP-  
447 12421)(Mlcochova *et al.*, 2015), pUC57\_HIV-1 M subtype C CH167(ARP-13544),  
448 pUC57rev\_HIV-1 M subtype C CH293(ARP-13539)(Parrish *et al.*, 2013). The following  
449 expression plasmids were used: pMM311 (Vpr-BlaM) (Cavrois *et al.*, 2002), the  
450 pmRuby2.Vpr vector was previously described (McDonald *et al.*, 2002) and kindly provided  
451 by Dr. Tom Hope. The pcDNA3.1 Vpx SIVmac239-Myc and the p $\Delta$  R8.9 packaging vector  
452 harboring a Vpx binding motif were previously described (Baldauf *et al.*, 2012).

453  
454 **Reagents.** The following antibodies were used: Zombie Violet dye (Biolegend), anti-p24 KC-  
455 57 antibody (Beckman Coulter), 2G12 anti-gp120 antibody (NIH HIV Reagent program:  
456 ARP-1476). The following dyes were used: Concanavalin A-488 (Sigma Aldrich) was used a  
457 concentration of 50  $\mu$ /ml to stain TZM-bl cell membrane for 10 min at RT in the dark, Alexa  
458 Fluor 488 NHS Ester (Invitrogen) was used to fluorescently label loose collagen gels as  
459 described below, Fluoromount DAPI (Thermo Sci) was used to mount coverslips and stain  
460 cell nuclei, the CCF2-AM dye (Thermo Scientific K1023) was used to perform HIV-1 entry  
461 assays The following reagents were used PEI (Sigma Aldrich, Servapore dialysis membranes  
462 (3.5 kDa MWCO, SERVA).



463

464 **Virus titer determination.** One step Syber Green based Product Enhanced Reverse  
465 Transcriptase assay (SG-PERT) was used to assess HIV-1 virus titers as described previously  
466 (Vermeire et al 2012). Briefly, concentrated virus stocks were first diluted in PBS, or culture  
467 supernatants were directly lysed in 2x lysis buffer (50 mM KCL, 100 mM Tris-HCl pH 7.4,  
468 40% glycerol, 0.25% Triton X-100) supplemented with 40 mU/ $\mu$ l Rnase inhibitor for 10  
469 minutes at room temperature. Lysed samples were then exported from BSL-3 and further  
470 diluted 1:10 in dilution buffer (5 mM  $(\text{NH}_4)_2\text{SO}_4$ , 20 mM KCL, 20 mM Tris-HCl pH 8). In  
471 parallel, 10  $\mu$ l per well of a dilution series of a virus standard (pCHIV,  $8.09 \times 10^8$  pURT/ $\mu$ l)  
472 were also lysed for 10 min. All lysed samples were then incubated with 10  $\mu$ l of 2x reaction  
473 buffer (1xdilution buffer, 10 mM  $\text{MgCl}_2$ , 2x BSA, 400  $\mu$ M each dATP, dTTP, dCTP, dGTP,  
474 1pmol of each RT forward and reverse primers, 8 ng MS2 RNA, SYBR Green 1:10000)  
475 supplemented with 0.5U of GoTaq HotStart Polymerase. RT-PCR reactions were carried out  
476 and read in a real-time PCR detector (CFX 96, Biorad) using the following program: (1) 42  
477  $^\circ\text{C}$  for .20 min, (2) 95 $^\circ\text{C}$  for 2 min, (3) 95 $^\circ\text{C}$  for 5s, (4) 60 $^\circ\text{C}$  for 5 s, (5) 72 $^\circ\text{C}$  for 15 s, 80 $^\circ\text{C}$   
478 for 7 s, repeat steps 3 to 6 for 40 cycles with a melting curve read out as a final step. Sequence  
479 of the used primers are as follows: fwd RT primer (TCCTGCTCAACTTCCTGTCGAG) and  
480 rev RT primer (CACAGGTCAAACCTCCTAGGAATG.)

481

482 **Virus infectivity determination.** To assess the infectivity of virus stocks, TZM-bl reporter  
483 cells were infected as previously described (Wei *et al*, 2002). In brief, TZM-bl cells stably  
484 expressing HIV-1 entry receptors and containing luciferase and  $\beta$ -galactosidase genes under  
485 the control of the HIV-1 LTR promoter were infected using dilution series of concentrated  
486 virus. 72h post-infection, cells were fixed in 3% PFA, and incubated with a substrate solution  
487 ( $\beta$ -Gal supplemented with 200  $\mu$ g/ml X-Gal) for 3h at 37 $^\circ\text{C}$ . Blue cells were counted to  
488 determine infectious virus titers in the form of Blue Cell Units (BCUs). For virus containing

489 cell culture supernatants, TZM-bl cells were infected in triplicates, and were lysed 3 days  
490 post-infection using 1x lysis buffer (Promega) for 10 min. Lysates were then incubated with  
491 Luciferase substrate (Promega), and luciferase activity was measured for 5s at a Tecan  
492 Infinity luminometer.

493 For saturation experiments,  $10^5$ ,  $10^6$ , or  $10^7$  BCUs were used for seeding or embedding in  
494 collagen matrices of equivalent volumes. The culture supernatants were then processed by  
495 SG-PERT. TZM-bl cells were infected using equivalent amounts of RT units for all  
496 conditions. Virus infectivity after seeding or embedding at different concentrations was then  
497 determined by measuring the average luciferase activity from cell lysates 3 days post  
498 infection. To assess the relative infectivity of viruses after seeding or embedding, the  
499 infectivity and RT activity of virus containing supernatants were assessed as described above.  
500 The relative infectivity of the respective supernatants was calculated as the average luciferase  
501 activity divided by the average amount of RT units measured from the culture supernatant.

502

503 **Virus embedding in 3D matrices.** Type I collagen matrices of different densities were  
504 polymerized as previously described (Imle *et al.*, 2019). In brief, dense collagen gels (3  
505 mg/ml) were generated by mixing 10X MEM medium with 7.5%  $\text{NaHCO}_3$  (both Gibco) and  
506 highly concentrated rat tail collagen I (Corning) at a 1:1:8 ratio on ice. Concentrated virus was  
507 then added to the neutralized and chilled collagen solution at a 1:1 ratio. 100  $\mu\text{l}$  of virus  
508 containing collagen solutions were then distributed in each well in a 96 well-plate and  
509 allowed to polymerize within 15 minutes at  $37^\circ\text{C}$ . Loose collagen gels (1.7 mg/ml) were  
510 generated by mixing 10X MEM medium with 7.5%  $\text{NaHCO}_3$  (both Gibco) and bovine skin  
511 collagen I (PureCol, Advanced Biomatrix) at a 1:1:8 ratio on ice. Concentrated virus was then  
512 added to the neutralized and chilled collagen solution at a 1:1 ratio and, and the mixture was  
513 allowed to pre-polymerize for 10 min at  $37^\circ\text{C}$ . 100  $\mu\text{l}$  per well were then transferred to a 96-  
514 well plate. Gels were allowed to polymerize within 45 minutes at  $37^\circ\text{C}$ .

515 Human lyophilized placental type III collagen (Advance Biomatrix) was reconstituted using a  
516 chilled 2 mM CH<sub>3</sub>COOH solution on ice to reach 6 mg/ml. Type III collagen matrices (3  
517 mg/ml) were generated by mixing 10X MEM with 7.5% NaHCO<sub>3</sub> (both Gibco) with the  
518 reconstituted type III collagen solution at a 1:1:8 ratio on ice. Concentrated virus was then  
519 added to the neutralized and chilled collagen solution at a 1:1 ratio. Gels were allowed to  
520 polymerize within 30 min at 37°C.

521 Similarly, Matrigel (Matrigel Growth Factor Reduced Basement Membrane, Corning) gels (5  
522 mg/ml) were generated according to manufacturer protocol. In brief, concentrated Matrigel  
523 aliquots (8.9 mg/ml) were thawed at 4°C overnight. Thawed Matrigel was then combined  
524 with DMEM containing concentrated virus at a 3:2 ratio on ice. 100 µl of mixture was  
525 transferred to a 96-well plate, gels were allowed to polymerize within 45 min at 37°C.

526 Agarose gels were prepared by preparing a 0.8% agarose solution in PBS. The dissolved  
527 agarose solution was combined 1:1 with DMEM containing concentrated virus. 100 µl of the  
528 mixture was transferred to a 96-well plate, gels were allowed to polymerize at 4°C within 15  
529 minutes.

530 All polymerized gels were then overlaid with pre-warmed with 100 µl DMEM and incubated  
531 at 37°C. Culture supernatants were harvested at the indicated time points and processed for  
532 relative infectivity determination.

533  
534 **Fluorescent collagen gels.** Fluorescently labelled loose collagen gels were generated as  
535 described previously (Sixt & Lammermann, 2011). In brief, 5 mg of Alexa Fluor 488 NHS  
536 Ester dye (Invitrogen) was dissolved in 0.5 ml DMSO. The dissolved dye was then combined  
537 with PureCol bovine skin collagen (3 mg/ml) at a 1:100 ratio on ice and stirred overnight at  
538 4°C. After labelling, the excess dye was removed by dialysis using a 3.5 kDa molecular  
539 weight cut off Servapore tubing (Serva), placed in 1 L of acetic acid solution (0.02 N, pH 3.9)  
540 and stirred for one week at 4°C. The resulting collagen solution was kept at 4°C until further

541 use. Fluorescently labelled collagen gels were polymerized as described above, by combining  
542 labelled and unlabelled collagen solutions at a 1:10 ratio.

543

544 **Western blot.** For detection of gp120 on virions from supernatants of suspension and  
545 collagen cultures, supernatants were concentrated by ultracentrifugation through a 20%  
546 sucrose cushion (44000 rpm, 45 min) using an Optima LE-80k ultracentrifuge (Beckman  
547 Coulter), and lysed in 2x SDS sample buffer (10% glycerol, 6% SDS, 130 mM Tris Hcl pH  
548 6.8, 10%  $\beta$ -Mercaptoethanol) and boiled for 5 min. Protein samples and were resolved with  
549 SDS-PAGE electrophoresis and blotted onto nitrocellulose membranes. Membranes were  
550 blocked in 4% milk/TBST for 1 h and were incubated with primary antibodies overnight. We  
551 used secondary antibodies conjugated to IRDye700/800 (1:20000, Rockland) for fluorescent  
552 detection with Licor (Odyssey).

553

554 **Confocal reflection microscopy.** Collagen gels were imaged by confocal reflection  
555 microscopy as previously described (Imle *et al.*, 2019; Wolf *et al.*, 2009). Briefly, different  
556 collagen gels were generated in 15 well angiogenesis  $\mu$ -slides (Ibidi) as described above.  
557 Point laser scanning confocal microscopy was then performed on a Leica SP8 microscope  
558 using an HC PL APO CS2 63x/1.4 N.A. oil immersion objective. Images were acquired using  
559 PMT detectors in reflection mode with a laser excitation at 567 nm, and a spectral detection  
560 window set between 550 nm and 570 nm wavelengths. Fluorescently stained collagen  
561 matrices were additionally imaged using a 488 nm laser.

562

563 **Widefield imaging.** To assess the presence of fluorescently labelled collagen at the surface of  
564 NL4.3 Vpr-mRuby2 virions, viruses were embedded in stained or unstained loose collagen  
565 matrices as described above. The culture supernatants were then harvested and  
566 ultracentrifuged through a 20% (w/v) sucrose cushion. Virus pellets were resuspended in 3%

567 PFA for 1h30. The fixed virus particles were then seeded on 0.01% poly-L-lysine coated  
568 coverslips for 30 min and mounted on microscopy slides with Fluoromount DAPI  
569 (Invitrogen). Samples were then imaged using an epifluorescence microscope (Olympus IX81  
570 S1F-3) under a 100X oil objective (PlanApo, N.a. 1.40). Quantification of double positive  
571 Vpr-mRuby2 and Alexa Fluor 488 signals was performed using the Spot Detector plugin of  
572 the Icy Imaging analysis software.

573

574 **Harvesting of collagen fibers for cryo-ET analysis.** To assess the morphology of single  
575 collagen fibers by cryo ET, dense or loose collagen gels were prepared as previously in 1.5 ml  
576 Eppendorf tubes. Polymerized gels were disrupted by sonication on a Sonorex super RK 102  
577 H sonicator for 10 sec on ice. Disrupted individual fibers were resuspended in PBS, and  
578 further processed for cyro-ET.

579

580 **Plunge freezing.** Collagen fibers and supernatant for plunge freezing were collected as  
581 described above. Holey carbon grids (Cu 200 mesh, R2/1, Quantifoil®) were plasma-cleaned  
582 for 10 s in a Gatan Solarus 950 (Gatan). Samples were mixed with 10x concentrated 10 nm  
583 protein A gold (Aurion) prior plunge freezing. A total volume of 3 µl was used for plunge  
584 freezing into liquid ethane using an automatic plunge freezer EM GP2 (Leica). The ethane  
585 temperature was set to -183 °C and the chamber to 24 °C with 80% humidity. Grids were  
586 blotted from the back with Whatman™ Type 1 paper for 3 s. Grids were clipped into  
587 AutoGrids™ (Thermo Fisher Scientific).

588

589 **Cryo-electron tomography and tomogram reconstruction.** Cryo-electron tomography was  
590 performed using a Krios cryo-TEM (Thermo Fisher Scientific) operated at 300 keV and  
591 equipped with a post-column BioQuantum Gatan Imaging energy filter (Gatan) and K3 direct  
592 electron detector (Gatan) with an energy slit set to 15 eV. As a first step, positions on the grid

593 were mapped at 8,700 $\times$  (pixel spacing of 10.64 Å) using a defocus of approximately -65  $\mu$ m  
594 in SerialEM (Mastrorarde, 2005) to localize collagen fibers or HIV particles. Tilt series were  
595 acquired using a dose-symmetric tilting scheme (Hagen *et al*, 2017) with a nominal tilt range  
596 of 60° to -60° with 3° increments with SerialEM. Tilt series were acquired at target focus -4  
597  $\mu$ m, with an electron dose per record of 3 e<sup>-</sup>/Å<sup>2</sup> and a magnification of 33,000 $\times$  (pixel spacing  
598 of 2.671 Å). Beam-induced sample motion and drift were corrected using MotionCor2 (Zheng  
599 *et al*, 2017). Tilt series were aligned using AreTomo (Zheng *et al*, 2022) and tomograms were  
600 reconstructed using R-weighted back projection algorithm with dose-weighting filter and  
601 SIRT-like filter 5 in IMOD (Kremer *et al*, 1996). Tomograms were used to measure diameter  
602 of HIV particles in IMOD. For visualization, tilt series were aligned using protein A gold as  
603 fiducials in IMOD. Tomograms in Fig. 2 were reconstructed using R-weighted back  
604 projection algorithm with 3DCTF, dose-weighting filter and SIRT-like filter 10. In IMOD, 15  
605 slices of the final tomogram were averaged and Fourier filtered. The diameter of HIV  
606 particles was measured from the outer leaflet of the viral membrane in IMOD. The average  
607 diameter of two measurements per particle was used in the graph.

608

609 **Infectivity enhancement experiments.** Culture supernatants from suspension seeded or  
610 collagen embedded virions were incubated with previously described infectivity enhancers to  
611 overcome ERVI. In brief, equivalent amounts of RT units of virus containing supernatants  
612 were incubated with different Peptide Nanofibrils (PNFs). EF-C (15  $\mu$ g/ml) (Yolamanova *et*  
613 *al.*, 2013) or RM-8 (15  $\mu$ g/ml) (Rauch-Wirth L *et al.*, 2023) were then incubated for 20 min at  
614 37°C prior to infection of TZM-bl cells. Relative infectivity of the treated virions was  
615 assessed as described previously.

616

617 **Binding assay.** To assess the binding capacity of collagen and suspensions treated virions,  
618 NL4.3 Vpr mRuby2 virions were seeded or embedded as previously described. Culture

619 supernatants were harvested 16h later, and viral titers were quantified by SG-PERT.  
620 Equivalent amounts of RT units were then used to infect TZM-bl cells seeded on glass  
621 coverslips in 24-well plates 24h prior to infection. Infection was carried out for 2h at 4°C to  
622 prevent virion internalization. The cells were then washed with PBS, and the plasma  
623 membrane was stained with Concanavalin A Alexa Fluor-488 (Invitrogen) according to  
624 manufacturer protocol. The samples were then fixed using 3% PFA for 1h30, and mounted on  
625 microscopy slides using Fluoromount-DAPI (Invitrogen). Spinning disk confocal microscopy  
626 was performed on a PerkinElmer UltraVIEW VoX microscope equipped with Yokogawa  
627 CSU-X1 spinning disk head and Nikon TiE microscope body. An Apo TIRF 60x/1.49 N.A.  
628 oil immersion objective and a Hamamatsu C9100-23B EM-CCD camera were used. Images  
629 were acquired using solid state lasers with excitation at 405nm, 488nm and 561nm with  
630 matching emission filters. Z-stacks were acquired with a z-spacing of 0.5 µM steps. To assess  
631 levels of virus binding between conditions, Z-stacks were 3D reconstructed using the Imaris  
632 software (Oxford instruments). Cell membranes and virions were segmented as individual  
633 surfaces, and statistic values (surface volumes, relative distance of surfaces) were exported by  
634 the software.

635

636 **Vpr-BlaM entry Assay.** TZM-bl reporter cells were infected at MOI 0.1 using HIV-1  
637 pNL4.3 viruses containing Vpr-BlaM, seeded in suspension or embedded in rat tail or bovine  
638 collagen for 16 hours. Concentrated virus that was not seeded in medium prior to infection  
639 was used as positive control, virus particles lacking Env were used as negative control. Fusion  
640 of HIV-1 particles was allowed to proceed for 4 h at 37°C. Cells were then washed twice in  
641 PBS and stained with 2mM CCF2-AM dye (Invitrogen) supplemented with 2.5 mM  
642 Probenecid in Fluorobrite DMEM 2% FCS for 6 h at 11°C to prevent particle fusion during  
643 the staining process according to manufacturer instructions. Where indicated, T20 was added



644 to block fusion. Cells were then trypsinized fixed in 3% PFA in PBS at 4°C overnight and  
645 analyzed by FACS.

646

647 **Primary CD4+ T cell infection.** Activated primary CD4+ T cells were infected in 96-well  
648 plated in triplicate with suspension and collagen culture supernatants containing NL4.3 R5 as  
649 previously described (Imle *et al.*, 2019). Briefly, equivalent RT units were used between the  
650 different conditions, as quantified by SG-PERT. The cells were spin-infected at 2000 rpm for  
651 1h30 in presence or absence of 3 µg/ml reverse transcriptase inhibitor Efavirenz (EFZ), then  
652 cultured at 37°C for 3 days. The samples were then stained with a fixable Zombie Violet dye  
653 (Biolegend), fixed in 3% PFA for 1h30, then stained with an anti-p24 KC-57 FITC antibody  
654 (Beckman Coulter) according to manufacturer protocol. Samples were then measured by flow  
655 cytometry.

656

657 **Primary MDM infection.** Differentiated macrophages were spin transduced at 37°C in a pre-  
658 heated centrifuge with lentiviral vectors containing Vpx<sub>mac239</sub> for 1h at 300 rpm. Within 16h  
659 post-transduction, cells were infected in triplicates with equivalent amounts of RT units as  
660 measured by SG-PERT from suspension and collagen culture supernatants in a 96-well plate  
661 format, in presence or absence of EFZ. MDMs were also treated with 50 ng/ml LPS as a  
662 positive control. Infected MDM culture supernatants were harvested 3 days post-infection and  
663 further processed for cytokine analysis. 5 days post-infection, cells were harvested by  
664 trypsinization, and stained with a fixable Zombie Violet dye (Biolegend), fixed in 3% PFA for  
665 1h30, then stained with an anti-p24 KC-57 FITC antibody (Beckman Coulter) according to  
666 manufacturer protocol. Infection rates were then determined by flow cytometry.

667

668 **Modelling.** The mathematical model that we used previously to estimate the contribution of  
669 cell-free and cell-to-cell transmission given different environmental conditions has been



670 described in detail within (Imle *et al.*, 2019). In brief, the model describes the turnover and  
671 dynamics of (un-)infected CD4+ T cells, CD8+ T cells and the viral load within the different  
672 culture systems by ordinary differential equations. The complete set of mathematical  
673 equations and detailed description, as well as pre-defined parameter values used within the  
674 analyses, are given within (Imle *et al.*, 2019). In the original publication, the model was fitted  
675 simultaneously to the data of a co-transfer experiment of infected and uninfected CD4+ T  
676 cells into 2D suspension, and 3D loose and dense collagen environments, with environmental  
677 restriction reducing the infectivity of cell-free virions within collagen, i.e., the transmission  
678 parameter  $\beta_f$ , to only 14% of the effectivity considered within suspension, i.e.,  $\beta_{f,loose} =$   
679  $\beta_{f,dense} = \eta\beta_{f,sus}$  with  $\eta = 0.14$ . Here, we re-performed the analysis done within (Imle *et*  
680 *al.*, 2019) by varying  $\eta$  between 0 and 1 within steps of 0.1, and also considering  $\eta = 0.275$   
681 as experimentally determined for primary target cells. Fitting was performed as described  
682 within (Imle *et al.*, 2019) using the *optim*-function within the R-language of statistical  
683 computing. Posterior distributions of parameter estimates were obtained by performing  
684 ensemble fits for each value of  $\eta$  based on different starting values. Subsequent filtering steps  
685 of fits ensured convergence of parameter estimates by excluding unreasonable dynamics of  
686 CD4+ T cell counts and viral loads, with posterior distributions based on ~110-145 successful  
687 fits for each value of  $\eta$  (see EV 4 A&B)).

688

689 **Flow cytometry.** Samples were measured by flow cytometry in BD FACS Celesta with BD  
690 FACS Diva Software. Compensation controls were added for each experiment. Gating was  
691 performed using FlowJo software 10.4.2 and data were processed in GraphPad Prism 8.4.3  
692 software.

693

694 **TLR inhibitor treatments.** To determine the sensing pathway involved in collagen mediated  
695 sensitization of virus particles for innate immune recognition, MDMs were pre-treated with

696 the different inhibitors prior to infection. 5  $\mu$ M of cGAS inhibitor (G140, Invivogen), 8  $\mu$ M of  
697 TLR 1/2 inhibitor (Cu-CPT22, Selleckchem), 49  $\mu$ M of TLR 4/6 inhibitor (GIT27, Tocris) or  
698 10  $\mu$ M of TLR 8 inhibitor (Cu-CPT9a, Invivogen) were incubated with MDMs 3h prior to  
699 infection. The Myd-88 inhibitor (Pepinh-MYD, Invivogen) was used at 20  $\mu$ M and incubated  
700 with MDMs 4h prior to infection. Finally, MDMs were also pre-treated for 1h with a  
701 TLR3/dsRNA complex inhibitor (Merck Millipore) 5  $\mu$ M final concentration. MDMs were  
702 also treated with 100  $\mu$ M of T20 HIV-1 fusion inhibitor (Roche) or 3  $\mu$ g/ml EFZ. The  
703 different inhibitors were supplemented again during virus inoculation. The cells were then  
704 cultured for 3 days at 37°C, and supernatants were harvested for cytokine analysis.

705

706 **Cytokine quantification.** The amounts of cytokines and chemokines present in cell culture  
707 supernatants were determined by Eve Technologies Corporation using the Discovery Assay®:  
708 Human Cytokine Array/Chemokine Array 48-Plex. Results are expressed in pg/ml of  
709 cytokines/chemokines according to the company protein standard. Cell-free supernatants were  
710 also analyzed for levels of Il-6, Il-8 and TNF- $\alpha$  by enzyme-linked immunosorbent assay  
711 (ELISA; BD Biosciences) according to manufacturer's instructions.

712

713 **Statistical analysis.** Statistical analysis of datasets was carried out using Prism version 8.4.3  
714 (GraphPad). Statistical significance was calculated using paired or unpaired one-way  
715 ANOVA tests, as well as Wilcoxon matched paired test. Correction for multiple comparisons  
716 are indicated in figure legends. n.s., not significant; \*,  $p < 0.05$ ; \*\*,  $p < 0.01$ , \*\*\* $p < 0,005$ .

717

## 718 **Acknowledgments**

719 This research was funded by the Deutsche Forschungsgemeinschaft (DFG, German Research  
720 Foundation) Projektnummer 240245660 – SFB 1129 (project 8 to OTF) and 316249678 –  
721 SFB 1279 (project A03 to JM). We are grateful to Katharina Morath, Swetha Ananth,

722 Christine Selhuber Unkel and Ada Cavalcanti-Adam for advice and discussion and to Volker  
723 Lohmann, Frank Kirchhoff and Tom Hope for sharing reagents.

724

### 725 **Author Contributions**

726 Conceptualization, O.T.F.; Methodology, S.S.A., F.G., Investigation, S.S.A., L.Z., A.I., N.T.,  
727 K.W.; Data analysis, S.S.A., L.Z.; Bioinformatic analysis, K.W., F.G.; Writing – Original  
728 Draft, O.T.F., S.S.A., L.Z. and F.G.; Writing – Review & Editing, O.T.F, S.S.A., F.G., P.C.;  
729 Funding Acquisition, O.T.F.; Resources, L.R., J.M.; Supervision, O.T.F, P.C., F.G.

730

### 731 **Declaration of Interests**

732 The authors declare no competing interests.

733

734 **References**

- 735 Ahmed SS, Bundgaard N, Graw F, Fackler OT (2020) Environmental Restrictions: A New Concept  
736 Governing HIV-1 Spread Emerging from Integrated Experimental-Computational Analysis of Tissue-  
737 Like 3D Cultures. *Cells* 9  
738
- 739 Anguiano M, Morales X, Castilla C, Pena AR, Ederra C, Martínez M, Ariz M, Esparza M, Amaveda  
740 H, Mora M *et al* (2020) The use of mixed collagen-Matrigel matrices of increasing complexity  
741 recapitulates the biphasic role of cell adhesion in cancer cell migration: ECM sensing, remodeling and  
742 forces at the leading edge of cancer invasion. *PLoS One* 15: e0220019  
743
- 744 Bahraoui E, Serrero M, Planès R (2020) HIV-1 Tat - TLR4/MD2 interaction drives the expression of  
745IDO-1 in monocytes derived dendritic cells through NF- $\kappa$ B dependent pathway. *Sci Rep* 10: 8177  
746
- 747 Baldauf HM, Pan X, Erikson E, Schmidt S, Daddacha W, Burggraf M, Schenkova K, Ambiel I,  
748 Wabnitz G, Gramberg T *et al* (2012) SAMHD1 restricts HIV-1 infection in resting CD4(+) T cells.  
749 *Nat Med* 18: 1682-1687  
750
- 751 Boesze-Battaglia K, Clayton ST, Schimmel RJ (1996) Cholesterol redistribution within human platelet  
752 plasma membrane: evidence for a stimulus-dependent event. *Biochemistry* 35: 6664-6673  
753
- 754 Bozek K, Lengauer T, Sierra S, Kaiser R, Domingues FS (2013) Analysis of physicochemical and  
755 structural properties determining HIV-1 coreceptor usage. *PLoS Comput Biol* 9: e1002977  
756
- 757 Braun E, Hotter D, Koepke L, Zech F, Groß R, Sparrer KMJ, Müller JA, Pfaller CK, Heusinger E,  
758 Wombacher R *et al* (2019) Guanylate-Binding Proteins 2 and 5 Exert Broad Antiviral Activity by  
759 Inhibiting Furin-Mediated Processing of Viral Envelope Proteins. *Cell Rep* 27: 2092-2104.e2010  
760
- 761 Brügger B, Glass B, Haberkant P, Leibrecht I, Wieland FT, Kräusslich HG (2006) The HIV lipidome:  
762 a raft with an unusual composition. *Proc Natl Acad Sci U S A* 103: 2641-2646  
763
- 764 Cavrois M, De Noronha C, Greene WC (2002) A sensitive and specific enzyme-based assay detecting  
765 HIV-1 virion fusion in primary T lymphocytes. *Nat Biotechnol* 20: 1151-1154  
766
- 767 Chertova E, Bess JW, Jr., Crise BJ, Sowder IR, Schaden TM, Hilburn JM, Hoxie JA, Benveniste RE,  
768 Lifson JD, Henderson LE *et al* (2002) Envelope glycoprotein incorporation, not shedding of surface  
769 envelope glycoprotein (gp120/SU), is the primary determinant of SU content of purified human  
770 immunodeficiency virus type 1 and simian immunodeficiency virus. *J Virol* 76: 5315-5325  
771
- 772 Chojnacki J, Staudt T, Glass B, Bingen P, Engelhardt J, Anders M, Schneider J, Müller B, Hell SW,  
773 Kräusslich HG (2012) Maturation-dependent HIV-1 surface protein redistribution revealed by  
774 fluorescence nanoscopy. *Science* 338: 524-528  
775
- 776 Choudhry V, Zhang MY, Harris I, Sidorov IA, Vu B, Dimitrov AS, Fouts T, Dimitrov DS (2006)  
777 Increased efficacy of HIV-1 neutralization by antibodies at low CCR5 surface concentration. *Biochem*  
778 *Biophys Res Commun* 348: 1107-1115  
779
- 780 Chow JC, Young DW, Golenbock DT, Christ WJ, Gusovsky F (1999) Toll-like receptor-4 mediates  
781 lipopolysaccharide-induced signal transduction. *J Biol Chem* 274: 10689-10692  
782
- 783 Day JR, Münk C, Guatelli JC (2004) The membrane-proximal tyrosine-based sorting signal of human  
784 immunodeficiency virus type 1 gp41 is required for optimal viral infectivity. *J Virol* 78: 1069-1079  
785

- 786 Del Cornò M, Cappon A, Donninelli G, Varano B, Marra F, Gessani S (2016) HIV-1 gp120 signaling  
787 through TLR4 modulates innate immune activation in human macrophages and the biology of hepatic  
788 stellate cells. *J Leukoc Biol* 100: 599-606  
789
- 790 Dimitrov DS, Willey RL, Sato H, Chang LJ, Blumenthal R, Martin MA (1993) Quantitation of human  
791 immunodeficiency virus type 1 infection kinetics. *J Virol* 67: 2182-2190  
792
- 793 Estes JD (2013) Pathobiology of HIV/SIV-associated changes in secondary lymphoid tissues.  
794 *Immunol Rev* 254: 65-77  
795
- 796 Fackler OT, Moris A, Tibroni N, Giese SI, Glass B, Schwartz O, Kräusslich HG (2006) Functional  
797 characterization of HIV-1 Nef mutants in the context of viral infection. *Virology* 351: 322-339  
798
- 799 Fackler OT, Peterlin BM (2000) Endocytic entry of HIV-1. *Curr Biol* 10: 1005-1008  
800
- 801 Foli A, Saville MW, Baseler MW, Yarchoan R (1995) Effects of the Th1 and Th2 stimulatory  
802 cytokines interleukin-12 and interleukin-4 on human immunodeficiency virus replication. *Blood* 85:  
803 2114-2123
- 804 Gallucci L, Abele T, Fronza R, Stolp B, Laketa V, Sid Ahmed S, Flemming A, Müller B, Göpflich K,  
805 Fackler OT (2023) Tissue-like environments shape functional interactions of HIV-1 with immature  
806 dendritic cells. *EMBO Rep* 24: e56818  
807
- 808 Gendelman HE, Orenstein JM, Martin MA, Ferrua C, Mitra R, Phipps T, Wahl LA, Lane HC, Fauci  
809 AS, Burke DS *et al* (1988) Efficient isolation and propagation of human immunodeficiency virus on  
810 recombinant colony-stimulating factor 1-treated monocytes. *J Exp Med* 167: 1428-1441  
811
- 812 Gringhuis SI, van der Vlist M, van den Berg LM, den Dunnen J, Litjens M, Geijtenbeek TB (2010)  
813 HIV-1 exploits innate signaling by TLR8 and DC-SIGN for productive infection of dendritic cells. *Nat*  
814 *Immunol* 11: 419-426  
815
- 816 Hagen WJH, Wan W, Briggs JAG (2017) Implementation of a cryo-electron tomography tilt-scheme  
817 optimized for high resolution subtomogram averaging. *J Struct Biol* 197: 191-198  
818
- 819 Heil F, Hemmi H, Hochrein H, Ampenberger F, Kirschning C, Akira S, Lipford G, Wagner H, Bauer  
820 S (2004) Species-specific recognition of single-stranded RNA via toll-like receptor 7 and 8. *Science*  
821 303: 1526-1529  
822
- 823 Hoshino S, Konishi M, Mori M, Shimura M, Nishitani C, Kuroki Y, Koyanagi Y, Kano S, Itabe H,  
824 Ishizaka Y (2010) HIV-1 Vpr induces TLR4/MyD88-mediated IL-6 production and reactivates viral  
825 production from latency. *J Leukoc Biol* 87: 1133-1143  
826
- 827 Hubner W, McNerney GP, Chen P, Dale BM, Gordon RE, Chuang FY, Li XD, Asmuth DM, Huser T,  
828 Chen BK (2009) Quantitative 3D video microscopy of HIV transfer across T cell virological synapses.  
829 *Science* 323: 1743-1747  
830
- 831 Imle A, Kumberger P, Schnellbacher ND, Fehr J, Carrillo-Bustamante P, Ales J, Schmidt P, Ritter C,  
832 Godinez WJ, Muller B *et al* (2019) Experimental and computational analyses reveal that  
833 environmental restrictions shape HIV-1 spread in 3D cultures. *Nat Commun* 10: 2144  
834
- 835 Iwami S, Takeuchi JS, Nakaoka S, Mammano F, Clavel F, Inaba H, Kobayashi T, Misawa N, Aihara  
836 K, Koyanagi Y *et al* (2015) Cell-to-cell infection by HIV contributes over half of virus infection. *Elife*  
837 4  
838
- 839 Jolly C, Kashefi K, Hollinshead M, Sattentau QJ (2004) HIV-1 cell to cell transfer across an Env-  
840 induced, actin-dependent synapse. *J Exp Med* 199: 283-293  
841

- 842 Jones MG, Andriotis OG, Roberts JJ, Lunn K, Tear VJ, Cao L, Ask K, Smart DE, Bonfanti A,  
843 Johnson P *et al* (2018) Nanoscale dysregulation of collagen structure-function disrupts mechano-  
844 homeostasis and mediates pulmonary fibrosis. *Elife* 7  
845
- 846 Kolodkin-Gal D, Hulot SL, Koriath-Schmitz B, Gombos RB, Zheng Y, Owuor J, Lifton MA, Ayeni  
847 C, Najarian RM, Yeh WW *et al* (2013) Efficiency of cell-free and cell-associated virus in mucosal  
848 transmission of human immunodeficiency virus type 1 and simian immunodeficiency virus. *J Virol* 87:  
849 13589-13597  
850
- 851 Krapp C, Hotter D, Gawanbacht A, McLaren PJ, Kluge SF, Stürzel CM, Mack K, Reith E, Engelhart  
852 S, Ciuffi A *et al* (2016) Guanylate Binding Protein (GBP) 5 Is an Interferon-Inducible Inhibitor of  
853 HIV-1 Infectivity. *Cell Host Microbe* 19: 504-514  
854
- 855 Kremer JR, Mastrorade DN, McIntosh JR (1996) Computer visualization of three-dimensional image  
856 data using IMOD. *J Struct Biol* 116: 71-76  
857
- 858 Li Y, Wang Z, Hou Y, Liu X, Hong J, Shi X, Huang X, Zhang T, Liao X, Zhang L (2023) Novel  
859 TLR7/8 agonists promote activation of HIV-1 latent reservoirs and human T and NK cells. *Front*  
860 *Microbiol* 14: 1033448  
861
- 862 Liu Y, Fu Y, Wang Q, Li M, Zhou Z, Dabbagh D, Fu C, Zhang H, Li S, Zhang T *et al* (2019)  
863 Proteomic profiling of HIV-1 infection of human CD4(+) T cells identifies PSGL-1 as an HIV  
864 restriction factor. *Nat Microbiol* 4: 813-825  
865
- 866 Lodermeier V, Suhr K, Schrott N, Kolbe C, Stürzel CM, Krnavek D, Münch J, Dietz C, Waldmann T,  
867 Kirchhoff F *et al* (2013) 90K, an interferon-stimulated gene product, reduces the infectivity of HIV-1.  
868 *Retrovirology* 10: 111  
869
- 870 Lopez P, Ajibola O, Pagliuzza A, Zayats R, Koh WH, Herschhorn A, Chomont N, Murooka TT  
871 (2022) T cell migration potentiates HIV infection by enhancing viral fusion and integration. *Cell Rep*  
872 38: 110406  
873
- 874 Maréchal V, Arenzana-Seisdedos F, Heard JM, Schwartz O (1999) Opposite effects of SDF-1 on  
875 human immunodeficiency virus type 1 replication. *J Virol* 73: 3608-3615  
876
- 877 Maréchal V, Clavel F, Heard JM, Schwartz O (1998) Cytosolic Gag p24 as an index of productive  
878 entry of human immunodeficiency virus type 1. *J Virol* 72: 2208-2212  
879
- 880 Maréchal V, Prevost MC, Petit C, Perret E, Heard JM, Schwartz O (2001) Human immunodeficiency  
881 virus type 1 entry into macrophages mediated by macropinocytosis. *J Virol* 75: 11166-11177  
882
- 883 Mastrorade DN (2005) Automated electron microscope tomography using robust prediction of  
884 specimen movements. *J Struct Biol* 152: 36-51  
885
- 886 McDonald D, Vodicka MA, Lucero G, Svitkina TM, Borisy GG, Emerman M, Hope TJ (2002)  
887 Visualization of the intracellular behavior of HIV in living cells. *J Cell Biol* 159: 441-452  
888
- 889 Meås HZ, Haug M, Beckwith MS, Louet C, Ryan L, Hu Z, Landskron J, Nordbø SA, Taskén K, Yin H  
890 *et al* (2020) Sensing of HIV-1 by TLR8 activates human T cells and reverses latency. *Nat Commun*  
891 11: 147  
892
- 893 Medzhitov R, Preston-Hurlburt P, Kopp E, Stadlen A, Chen C, Ghosh S, Janeway CA, Jr. (1998)  
894 MyD88 is an adaptor protein in the hToll/IL-1 receptor family signaling pathways. *Mol Cell* 2: 253-  
895 258  
896



- 897 Mlcochova P, Apolonia L, Kluge SF, Sridharan A, Kirchhoff F, Malim MH, Sauter D, Gupta RK  
898 (2015) Immune evasion activities of accessory proteins Vpu, Nef and Vif are conserved in acute and  
899 chronic HIV-1 infection. *Virology* 482: 72-78  
900
- 901 Murooka TT, Deruaz M, Marangoni F, Vrbanac VD, Seung E, von Andrian UH, Tager AM, Luster  
902 AD, Mempel TR (2012) HIV-infected T cells are migratory vehicles for viral dissemination. *Nature*  
903 490: 283-287  
904
- 905 Neil SJ, Zang T, Bieniasz PD (2008) Tetherin inhibits retrovirus release and is antagonized by HIV-1  
906 Vpu. *Nature* 451: 425-430  
907
- 908 Nieto-Garai JA, Arbolea A, Otaegi S, Chojnacki J, Casas J, Fabriàs G, Contreras FX, Kräusslich HG,  
909 Lorizate M (2021) Cholesterol in the Viral Membrane is a Molecular Switch Governing HIV-1 Env  
910 Clustering. *Adv Sci (Weinh)* 8: 2003468  
911
- 912 Ochsenbauer C, Edmonds TG, Ding H, Keele BF, Decker J, Salazar MG, Salazar-Gonzalez JF,  
913 Shattock R, Haynes BF, Shaw GM *et al* (2012) Generation of transmitted/founder HIV-1 infectious  
914 molecular clones and characterization of their replication capacity in CD4 T lymphocytes and  
915 monocyte-derived macrophages. *J Virol* 86: 2715-2728  
916
- 917 Oh DY, Taube S, Hamouda O, Kücherer C, Poggensee G, Jessen H, Eckert JK, Neumann K, Storek A,  
918 Pouliot M *et al* (2008) A functional toll-like receptor 8 variant is associated with HIV disease  
919 restriction. *J Infect Dis* 198: 701-709  
920
- 921 Parrish NF, Gao F, Li H, Giorgi EE, Barbian HJ, Parrish EH, Zajic L, Iyer SS, Decker JM, Kumar A  
922 *et al* (2013) Phenotypic properties of transmitted founder HIV-1. *Proc Natl Acad Sci U S A* 110: 6626-  
923 6633  
924
- 925 Phillips DM (1994) The role of cell-cell transmission in HIV-1 infection. *AIDS*  
926
- 927 Pierini V, Gallucci L, Stürzel CM, Kirchhoff F, Fackler OT (2021) SERINC5 Can Enhance  
928 Proinflammatory Cytokine Production by Primary Human Myeloid Cells in Response to Challenge  
929 with HIV-1 Particles. *J Virol* 95  
930
- 931 Poli G, Kinter AL, Fauci AS (1994) Interleukin 1 induces expression of the human immunodeficiency  
932 virus alone and in synergy with interleukin 6 in chronically infected U1 cells: inhibition of inductive  
933 effects by the interleukin 1 receptor antagonist. *Proc Natl Acad Sci U S A* 91: 108-112  
934
- 935 Rasaiyaah J, Tan CP, Fletcher AJ, Price AJ, Blondeau C, Hilditch L, Jacques DA, Selwood DL, James  
936 LC, Noursadeghi M *et al* (2013) HIV-1 evades innate immune recognition through specific cofactor  
937 recruitment. *Nature* 503: 402-405  
938
- 939 Rauch-Wirth L RA, Kaygisiz K WT, Zimmermann L., Rodriguez-Alfonso AA SD, Wiese S SL, Weil  
940 T, Schmiedel D, Münch J (2023) Optimized peptide nanofibrils as efficient transduction enhancers for  
941 in vitro and ex vivo gene transfer. *Front Immunol*  
942
- 943 Rosa A, Chande A, Ziglio S, De Sanctis V, Bertorelli R, Goh SL, McCauley SM, Nowosielska A,  
944 Antonarakis SE, Luban J *et al* (2015) HIV-1 Nef promotes infection by excluding SERINC5 from  
945 virion incorporation. *Nature* 526: 212-217  
946
- 947 Sáez-Cirión A, Nir S, Lorizate M, Agirre A, Cruz A, Pérez-Gil J, Nieva JL (2002) Sphingomyelin and  
948 cholesterol promote HIV-1 gp41 pretransmembrane sequence surface aggregation and membrane  
949 restructuring. *J Biol Chem* 277: 21776-21785  
950
- 951 Schaeffer E, Soros VB, Greene WC (2004) Compensatory link between fusion and endocytosis of  
952 human immunodeficiency virus type 1 in human CD4 T lymphocytes. *J Virol* 78: 1375-1383

- 953 Sewald X, Ladinsky MS, Uchil PD, Bloor J, Pi R, Herrmann C, Motamedi N, Murooka TT, Brehm  
954 MA, Greiner DL *et al* (2015) Retroviruses use CD169-mediated trans-infection of permissive  
955 lymphocytes to establish infection. *Science* 350: 563-567  
956
- 957 Shoulders MD, Raines RT (2009) Collagen structure and stability. *Annu Rev Biochem* 78: 929-958  
958
- 959 Sixt M, Lammermann T (2011) In vitro analysis of chemotactic leukocyte migration in 3D  
960 environments. *Methods Mol Biol* 769: 149-165  
961
- 962 Sourisseau M, Sol-Foulon N, Porrot F, Blanchet F, Schwartz O (2007) Inefficient human  
963 immunodeficiency virus replication in mobile lymphocytes. *J Virol* 81: 1000-1012  
964
- 965 Usami Y, Wu Y, Göttlinger HG (2015) SERINC3 and SERINC5 restrict HIV-1 infectivity and are  
966 counteracted by Nef. *Nature* 526: 218-223  
967
- 968 Venkatesh S, Bieniasz PD (2013) Mechanism of HIV-1 virion entrapment by tetherin. *PLoS Pathog* 9:  
969 e1003483  
970
- 971 Vyakarnam A, McKeating J, Meager A, Beverley PC (1990) Tumour necrosis factors (alpha, beta)  
972 induced by HIV-1 in peripheral blood mononuclear cells potentiate virus replication. *Aids* 4: 21-27  
973
- 974 Watala C, Waczulikova I, Wieclawska B, Rozalski M, Gresner P, Gwozdziński K, Mateasik A,  
975 Sikurova L (2002) Merocyanine 540 as a fluorescent probe of altered membrane phospholipid  
976 asymmetry in activated whole blood platelets. *Cytometry* 49: 119-133  
977
- 978 Wei X, Decker JM, Liu H, Zhang Z, Arani RB, Kilby JM, Saag MS, Wu X, Shaw GM, Kappes JC  
979 (2002) Emergence of resistant human immunodeficiency virus type 1 in patients receiving fusion  
980 inhibitor (T-20) monotherapy. *Antimicrob Agents Chemother* 46: 1896-1905  
981
- 982 Wolf K, Alexander S, Schacht V, Coussens LM, von Andrian UH, van Rheenen J, Deryugina E, Friedl  
983 P (2009) Collagen-based cell migration models in vitro and in vivo. *Semin Cell Dev Biol* 20: 931-941  
984 Yi L, Fang J, Isik N, Chim J, Jin T (2006) HIV gp120-induced interaction between CD4 and CCR5  
985 requires cholesterol-rich microenvironments revealed by live cell fluorescence resonance energy  
986 transfer imaging. *J Biol Chem* 281: 35446-35453  
987
- 988 Yin X, Langer S, Zhang Z, Herbert KM, Yoh S, König R, Chanda SK (2020) Sensor Sensibility-HIV-  
989 1 and the Innate Immune Response. *Cells* 9  
990
- 991 Yolamanova M, Meier C, Shaytan AK, Vas V, Bertocini CW, Arnold F, Zirafi O, Usmani SM,  
992 Müller JA, Sauter D *et al* (2013) Peptide nanofibrils boost retroviral gene transfer and provide a rapid  
993 means for concentrating viruses. *Nat Nanotechnol* 8: 130-136  
994
- 995 Zheng S, Wolff G, Greenan G, Chen Z, Faas FGA, Bárcena M, Koster AJ, Cheng Y, Agard DA  
996 (2022) AreTomo: An integrated software package for automated marker-free, motion-corrected cryo-  
997 electron tomographic alignment and reconstruction. *J Struct Biol X* 6: 100068  
998
- 999 Zheng SQ, Palovcak E, Armache JP, Verba KA, Cheng Y, Agard DA (2017) MotionCor2: anisotropic  
1000 correction of beam-induced motion for improved cryo-electron microscopy. *Nat Methods* 14: 331-332

1001



1002 **Figure legends**

1003 **Figure 1: ERVI is Rapidly Induced, Saturable, and conserved across viruses and**  
1004 **different types of matrices.** A. Experimental workflow. HIV-1 NL4.3 viruses were seeded in  
1005 suspension or embedded in type I collagen matrices of different densities. Supernatants of the  
1006 cultures were harvested at different time points; RT activity was measured by SG-PERT and  
1007 TZM-bl reporter cells were infected with equivalent volumes of culture supernatant to  
1008 determine virion relative infectivity. B. Relative infectivity of HIV-1 NL4.3 particles after  
1009 seeding or embedding for 16h. Data is normalized to suspension seeded virions (grey dotted  
1010 line) Significance was calculated by one-way ANOVA test after Dunnett multiple comparison  
1011 correction. C. Kinetics of ERVI. Culture supernatants were harvested at 0, 4, 8 or 16h post  
1012 seeding/embedding and relative infectivity of virions was determined as in B. D.  
1013 Conservation of ERVI across HIV-1, HIV-2 and single round lentiviral pseudotypes. Lab  
1014 adapted HIV-1 strains (NL4.3, NL4.3  $\Delta$ Nef, NL4.3 R5, ADA) as well as primary isolates  
1015 (Transmitted/Founder: CH077, CH058.c and CH0198; Chronic; RHGA, CH0167, CH0293),  
1016 but also HIV-2 Rod9 GFP and VSVg pseudotyped NL4.3  $\Delta$ Env virions were seeded in  
1017 suspension or embedded in collagen cultures for 16h as described in Fig.1.A. The relative  
1018 infectivity of the virions was then assessed by SG-PERT and TZM-bl infection as previously  
1019 described. Data is normalized to suspension condition for each virus (grey dotted line).  
1020 Significance was calculated by one-way ANOVA test after Dunnett's multiple comparison  
1021 correction. E. HCV lentiviral pseudotypes are more resistant to ERVI than VSVg  
1022 pseudotypes. Lentiviral particles were seeded/embedded and Huh 7.5 cells were transduced as  
1023 described in C. Transduced cells were quantified by flow cytometry analysis of GFP  
1024 expressing cells 5 days post transduction. Data is normalized to suspension condition for each  
1025 virus (grey dotted line). Significance was calculated by one-way ANOVA test by matched  
1026 two-way ANOVA after Tukey correction. F. Saturation of ERVI. Increasing concentrations of  
1027 virus were seeded or embedded in the equivalent volume of matrix/medium for 16h.

1028 Supernatants were then processed to determine the HIV-1 relative infectivity as in B.  
1029 Significance was calculated by matched two-way ANOVA test after Tukey correction. G.  
1030 Experimental workflow. HIV-1 NL4.3 viruses were seeded in suspension or embedded in  
1031 different types of 3D matrices: dense or loose type I collagen matrices, human type III  
1032 collagen matrices, Matrigel or agarose gels. Supernatants of the cultures were harvested 16h  
1033 post seeding/embedding; RT activity was measured by SG PERT and TZM-bl reporter cells  
1034 were infected with equivalent amounts of RT units for 3 days. The cells were then lysed, and  
1035 infectivity was measured by assessing luciferase activity from cell lysates. H. Collagen  
1036 containing matrices, but not agarose are able to restrict HIV-1 infectivity. Relative infectivity  
1037 of HIV-1 NL4.3 particles after seeding or embedding in different matrices for 16h. Data is  
1038 normalized to respective suspension seeded virions (grey dotted line). Significance was  
1039 calculated by one-way ANOVA test after Dunnett's multiple comparison correction. Results  
1040 represent the mean  $\pm$  SD of 3 independent experiments. Symbols indicate data from  
1041 individual experiments. \*P<0.05; \*\*P<0.001; \*\*\*P<0.005; n.s. not significant.

1042

1043 **Figure 2: ERVI does not result from collagen deposition or structural damages of**  
1044 **embedded virions.** A. Relative infectivity of Vpr-mRuby2 containing HIV-1 NL4.3 virions,  
1045 seeded in suspension or embedded in unstained, or AlexaFluor-488 stained loose collagen  
1046 matrices for 16h. Data is normalized to suspension condition (Grey dotted line). Significance  
1047 was calculated by one-way ANOVA test after Dunnett's multiple comparison correction. B.  
1048 Representative micrographs of virions used in A. White arrows indicate Vpr-mRuby2 and  
1049 AlexaFluor-488 positive virions. C. Quantification of the frequency of double positive events  
1050 shown in panel C. Significance was calculated by unpaired one-way ANOVA test after  
1051 Tukey's multiple comparison correction. D. Averaged slices of a tomogram showing HIV-1  
1052 NL4.3 virions after 16h of culture in suspension (left panel), dense collagen (middle panel), or  
1053 loose collagen (right panel). Scale bar = 50 nm. E. Quantification of the diameter of virus

1054 particles treated as indicated in D. Violin plot shows individual data points with  
1055 corresponding median, 25% and 75% quartiles. Significance was calculated by unpaired t-  
1056 tests. F. Averaged slices of a tomogram showing disrupted dense (left panel) or loose (right  
1057 panel) collagen fibres. Scale bar = 100 nm. G. Experimental workflow. HIV-1 NL4.3 virions  
1058 were seeded in suspension or embedded in collagen matrices as previously described. 16h  
1059 post seeding/embedding, virions were harvested and equivalent amounts of RT units were  
1060 incubated with infectivity enhancing peptides for 10 minutes prior to infection of TZM-bl  
1061 reporter cells. H. Relative infectivity of PNF treated virions. Results represent the mean  $\pm$  SD  
1062 of 3 independent experiments. Symbols indicate individual experiments. \* $P < 0.05$ ;  
1063 \*\*\* $P < 0.005$ ; n.s. not significant.

1064

1065 **Figure 3: Collagen matrices do not affect the ability of viral particles to bind to target**  
1066 **cells but triggers aggregation at the surface of target cells.** A. Experimental workflow.  
1067 HIV-1 NL4.3 Vpr-mRuby2 virions were seeded in suspension or embedded in dense or loose  
1068 collagen matrices for 16h. Culture supernatants were then collected, and equivalent amounts  
1069 of RT units were incubated with TZM-bl cells for 2h at 4°C. Additionally virus particles that  
1070 were not seeded in suspension for 16h (control, untreated virus) were used. Cell membranes  
1071 were then stained using Concanavalin-A AF-488, prior to microscopy processing. B. Relative  
1072 infectivity of HIV-1 NL4.3 Vpr-mRuby2 virions after seeding/embedding for 16h.  
1073 Significance was calculated by one-way ANOVA test after Dunnett's multiple comparison  
1074 correction. C. Representative micrographs of cells incubated with HIV-1 NL4.3 Vpr-mRuby2  
1075 virions, either from concentrated stock, or seeded/embedded for 16h. Yellow arrows indicate  
1076 Vpr-mRuby2+ spots detected at the surface of the target cells. Scale bar= 15  $\mu$ m. D.  
1077 Quantification of the average binding frequency of HIV-1 NL4.3 Vpr-mRuby2 virions to  
1078 target cells as shown in C. Significance was calculated by one-way ANOVA test after  
1079 Tukey's multiple comparison correction. E. Quantification of the average volume of the Vpr-

1080 mRuby2 spots detected as shown in C. Significance was calculated by one-way ANOVA test  
1081 after Tukey's multiple comparison correction. Results represent the mean  $\pm$  SD from 3  
1082 independent experiment. Symbols indicate individual experiments. \*P<0.05, \*\*P<0.001,  
1083 \*\*\*P<0.005; n.s. not significant.

1084

1085 **Figure 4: Collagen matrices impair viral fusion with target cells.** A. Experimental  
1086 workflow. HIV-1 NL4.3 VprBlaM virions were seeded in suspension or embedded in dense  
1087 or loose collagen matrices for 16h. Culture supernatants were then collected, and equivalent  
1088 amounts of RT units were incubated with TZM-bl cells for 4h at 37°C, in the presence or  
1089 absence of the T20 fusion inhibitor. Additionally, virus particles that were not seeded in  
1090 suspension for 16h (control, untreated virus) were used. Cells were then loaded with the  
1091 CCF2-AM dye for 10h at 11°C and processed by flow cytometry. B. Relative infectivity of  
1092 HIV-1 NL4.3 VprBlaM virions 16h post seeding/embedding. Significance was calculated by  
1093 unpaired one-way ANOVA test after Dunnett's multiple comparison correction. C.  
1094 Representative flow cytometry dot plots depicting the appearance of CCF2 cleavage product  
1095 by B-lactamase 4h post-infection. Gates indicate cells in which virus entry occurred. D.  
1096 Quantification of the percentage of CCF2-product positive cells measured by flow cytometry.  
1097 Significance was calculated by one-way ANOVA test after Tukey's multiple comparison  
1098 correction. E. Reduction of HIV-1 virus entry in TZM-bl target cells correlates with their  
1099 reduced relative infectivity after ERVI. Correlation between Relative Infectivity was assessed  
1100 by linear regression. Results represent the mean  $\pm$  SD from 3 independent experiments.  
1101 Symbols indicate individual experiments. \*P<0.05; \*\*P<0.001; \*\*\*P<0.005, n.s.: not  
1102 significant.

1103

1104 **Figure 5: ERVI does not affect infection of primary cells but sensitizes virus particles for**  
1105 **innate immune recognition by MDMs.** A. Experimental workflow. HIV-1 NL4.3 R5 virions  
1106 were seeded in suspension or embedded in dense or loose collagen matrices for 16h. Culture  
1107 supernatants were then collected, and equivalent amounts of RT units were incubated with  
1108 MDMs or activated CD4<sup>+</sup> T cells, in the presence or absence of the reverse transcription  
1109 inhibitor Efavirenz. CD4<sup>+</sup> T cells were harvested 3 days post infection for p24 quantification  
1110 by flow cytometry. Supernatants from MDMs were harvested 3 days post infection for  
1111 cytokine analysis, and cells were harvested 5 days post infection for p24 quantification by  
1112 flow cytometry. B. Relative infectivity of HIV-1 NL4.3 R5 virions 16h post  
1113 seeding/embedding. Significance was calculated by unpaired one-way ANOVA test after  
1114 Tukey's multiple comparison correction C. Quantification of the percentage of p24<sup>+</sup> CD4<sup>+</sup> T  
1115 cells by flow cytometry. CD4<sup>+</sup> T cells were activated using Dynabeads for 3 days prior to  
1116 infection and treated as described in A. Data is displayed for 4 independent donors.  
1117 Significance was calculated by matched two-way ANOVA test after Tukey's multiple  
1118 comparison correction. D. Quantification of the percentage of p24<sup>+</sup> MDMs by flow  
1119 cytometry. Monocytes were differentiated to MDMs for 10 days and transduced with Vpx-  
1120 VLPs 16h prior to infection. Cells were then treated as described in A. Graphs depict mean  
1121 values  $\pm$  SD for 6 donors. Significance was calculated by matched two-way ANOVA test  
1122 after Tukey's multiple comparison correction. E. Estimated fraction of cells infected by cell-  
1123 free transmission after 21 days for the three environmental conditions given different values  
1124 for the reduced efficacy of virion infectivity by ERVI,  $\eta$ . The plots show the posterior  
1125 distributions of estimates over ~110-140 fits per value of  $\eta$  with dots indicating the estimate  
1126 of the best model fit (see also Materials & Methods). Results for measured values of  $\eta = 0.14$   
1127 (Imle et al. 2019) and  $\eta = 0.275$  (here) are shown in light colours. Results represent the mean  
1128  $\pm$  SD from 3 independent experiments, or 4/5 5 independent donors. \*P<0.05; \*\*P<0.001; n.s.:  
1129 not significant.

1130

1131 **Figure 6: ERVI sensitizes HIV-1 virions for TLR-8 and TLR-4 innate immune**

1132 **recognition.** A. Experimental workflow. Monocytes were differentiated into MDMs for 10

1133 days as described previously. MDMs were then challenged with HIV-1 NL4.3 R5 virus that

1134 was kept in suspension or collagen, in presence or absence of TLR inhibitors, Efavirenz or

1135 T20 for 3 days. Culture supernatants were then harvested and processed for IL-6 and IL-8

1136 ELISA. B. Cytokine profiling of the supernatants of infected MDMs. Supernatants of infected

1137 MDMs were harvested 3 days post infection and processed for cytokine analysis. Heatmaps

1138 indicate Log2 fold change of cytokines in infected conditions as compared to mock infected

1139 conditions for 2 donors. Cytokines that were induced by dense collagen cultured virions >5-

1140 fold as compared to suspension conditions for both donors are highlighted in red. C. IL-6

1141 concentration determined by ELISA analysis of infected MDM supernatants. MDMs were

1142 infected with HIV-1 NL4.3 R5 kept in suspension or dense collagen in presence or absence of

1143 antiviral drugs or PRR inhibitors as described in A. Supernatants were harvested 3 days post

1144 infection and processed by ELISA for IL-6 concentration determination. Data is normalized to

1145 mock infected condition. Significance was calculated by matched two-way ANOVA test after

1146 Tukey's multiple comparison correction. Results represent the mean  $\pm$  SD from 3 independent

1147 donors. Symbols indicate individual donors. \*P<0.05; \*\*P<0.001; \*\*\*P<0.005; n.s.: not

1148 significant.

1149

1150 **Figure 7: Schematic model of reduction of cell-free virion infectivity and sensitization**

1151 **for innate immune recognition by ERVI.** Physical contact with collagen fibers reduces the

1152 ability of HIV-1 particles to fuse with target cells, resulting in the recognition of HIV-1 Env

1153 by TLR-4 or their uptake via an alternative pathway in which TLR-8-mediated sensing of the

1154 HIV-1 genome occurs. Triggering of TLR-4 and -8 results in increased production of

1155 proinflammatory cytokines. See text for details.

1156

1157 **Extended View 1: Determinants of virus sensitivity to ERVI and assessment of different**

1158 **matrices.** Collagen embedding does not lead to Env shedding. HIV-1 NL4.3 virions were

1159 seeded in suspension or dense collagen cultures for 24h. Viruses were then collected from

1160 culture supernatants and concentrated by ultracentrifugation, and analyzed by western blot

1161 using the Licor technology. The gp120/gp41 ratio was determined by incubation of

1162 membranes with a human anti-gp120 antibody (2G12) and subsequent secondary antibodies

1163 conjugated to IRDye700/800 for fluorescent detection with Licor. Membranes were also

1164 blotted using a rabbit anti-p24 antibody as loading control. One representative blot is shown.

1165 B. Quantification of the gp120:p24 ratio from Western blots as in A. Significance was

1166 calculated by Wilcoxon matched paired test. C. Lentiviral pseudotype transduce Huh 7.5 cells

1167 more efficiently than Tzm-bl cells. Lentiviral particles were pseudotyped with type I (HA,

1168 Ebola virus GP), type II (HCV strains Con1 & JFH1) or type III (VSVg) fusion glycoproteins.

1169 TZM-bl or Huh 7.5 cells were transduced with lentiviral vectors for 5 days, and the

1170 percentage of GFP+ cells was quantified by flow cytometry. Data from one experiment is

1171 shown. D. Culture of lentiviral pseudotypes has differential effects on their infectivity.

1172 Lentiviral pseudotypes as in C. were seeded in suspension, dense or loose collagen cultures

1173 for 16h. Huh 7.5 cells were then transduced with equivalent RT units for each virus for 5

1174 days. The percentage of GFP+ cells was then quantified by flow cytometry. Data from one

1175 experiment is shown. E. Representative confocal auto-reflection micrographs of different 3D

1176 matrices. Different matrices were polymerized (see methods section) in 15-well Ibidi slides

1177 and imaged by confocal microscopy to assess fiber morphology and density. Scale bar: 10

1178  $\mu\text{m}$ . Data is representative of one or three independent experiments. Results represent the

1179 mean  $\pm$  SD from 3 independent donors. Symbols indicate individual donors. n.s.: not

1180 significant.

1181



1182 **Extended View 2: Characterization of collagen fibers.** A. Representative confocal  
1183 micrographs of fluorescently stained loose collagen gels. Acid dissolved loose collagen was  
1184 stained using AlexaFluor-488 NHS Ester dye (see Materials & methods section).  
1185 Fluorescently stained collagen gels were obtained by mixing stained and unstained collagen at  
1186 a 1:10 ratio. Samples were then imaged by confocal microscopy, illuminated using a 488 nm  
1187 laser for fluorescence detection, and imaged by auto-reflection. Scale bar: 10  $\mu\text{m}$ . B. Low  
1188 magnification image of collagen fibers on EM grids. Scale bar: 1  $\mu\text{m}$ .

1189

1190 **Extended View 3: Establishment of a workflow for automated detection of surface**  
1191 **bound HIV-1 particles.** HIV-1 NL4.3 VprMRuby2 virions were seeded in suspension or  
1192 collagen cultures for 16h. Supernatants were harvested, and equivalent amounts of RT units  
1193 were used to infect TZM-bl cells for 2h at 4°C. After staining of plasma membrane using  
1194 Concanavalin-A 488, cells were fixed and processed for spinning disk microscopy image  
1195 acquisition. The resulting z-stacks were loaded in Imaris for 3D reconstruction (left panel:  
1196 raw data). Virions were segmented using the 568 channel and the “surfaces” tool in Imaris,  
1197 with appropriate intensity and background thresholds (middle panel: red surfaces indicate  
1198 segmented virions). Next, cells were then segmented using the DAPI and 488 channels,  
1199 respectively staining nuclei and cellular membranes, by using the “cells” segmentation tool in  
1200 Imaris (right panel: colored surfaces indicate single segmented cells). After segmentation,  
1201 quantification of bound virus was performed by the quantification of virus surfaces that were  
1202 distant no more than 0.5  $\mu\text{m}$  of the nearest segmented cell surface. Quantification of the  
1203 volumes of segmented virions was also performed by Imaris.

1204

1205 **Extended View 4: Modelling the impact of ERVI on HIV-1 spread in collagen**  
1206 **lymphocyte cultures.** A. Filtering process of individual model fits to ensure comparability of  
1207 estimates for different reduced efficacies  $\eta$ , used within the mathematical model shown in

1208 (Imle et al. 2019). A sequence of different filtering steps is applied to the results of the  
1209 ensemble fits given different starting conditions only considering fits with residual sum of  
1210 squares (RSS)  $<10^4$  (filter 1), disregarding fits with predictions of  $>6000$  cells after 12.5 days  
1211 or viral concentrations  $>10^{6.8}$  RT  $\mu\text{l}^{-1}$  after 21 days in the supernatant for loose collagen (filter  
1212 2), disregarding fits with  $>7.5 \times 10^4$  CD4 T cells after 5 days in suspension (filter 3), and  
1213 excluding fits with  $>5000$  CD4 T cells within the first 5 days or  $>2 \times 10^4$  cells after 20 days for  
1214 dense collagen. The procedure is repeated to ensure comparable number of estimates for each  
1215 value of  $\eta$  after the filtering for the analysis. B. Number of fits per value of  $\eta$  considered  
1216 within the analyses. C. Distribution of estimates for the individual parameters describing cell  
1217 infection dynamics within suspension and 3D collagen environments. Results of the best fit  
1218 for each value of  $\eta$  are indicated by the white dot. For the meaning of the individual  
1219 parameters and specific model equations see Imle et al., 2019.

1220

1221 **Extended View 5: ERVI induces IL-8 production by MDMs via TLR-8 sensing.** A.  
1222 Supernatants from infected MDMs were harvested 3 days post infection and processed by  
1223 ELISA for IL-8 concentration determination. Significance was calculated by paired one-way  
1224 ANOVA after Dunnett's multiple comparison correction. Results represent the mean  $\pm$  SD for  
1225 3 independent donors. Symbols indicate individual donors.  $p^* < 0.05$ .

1226

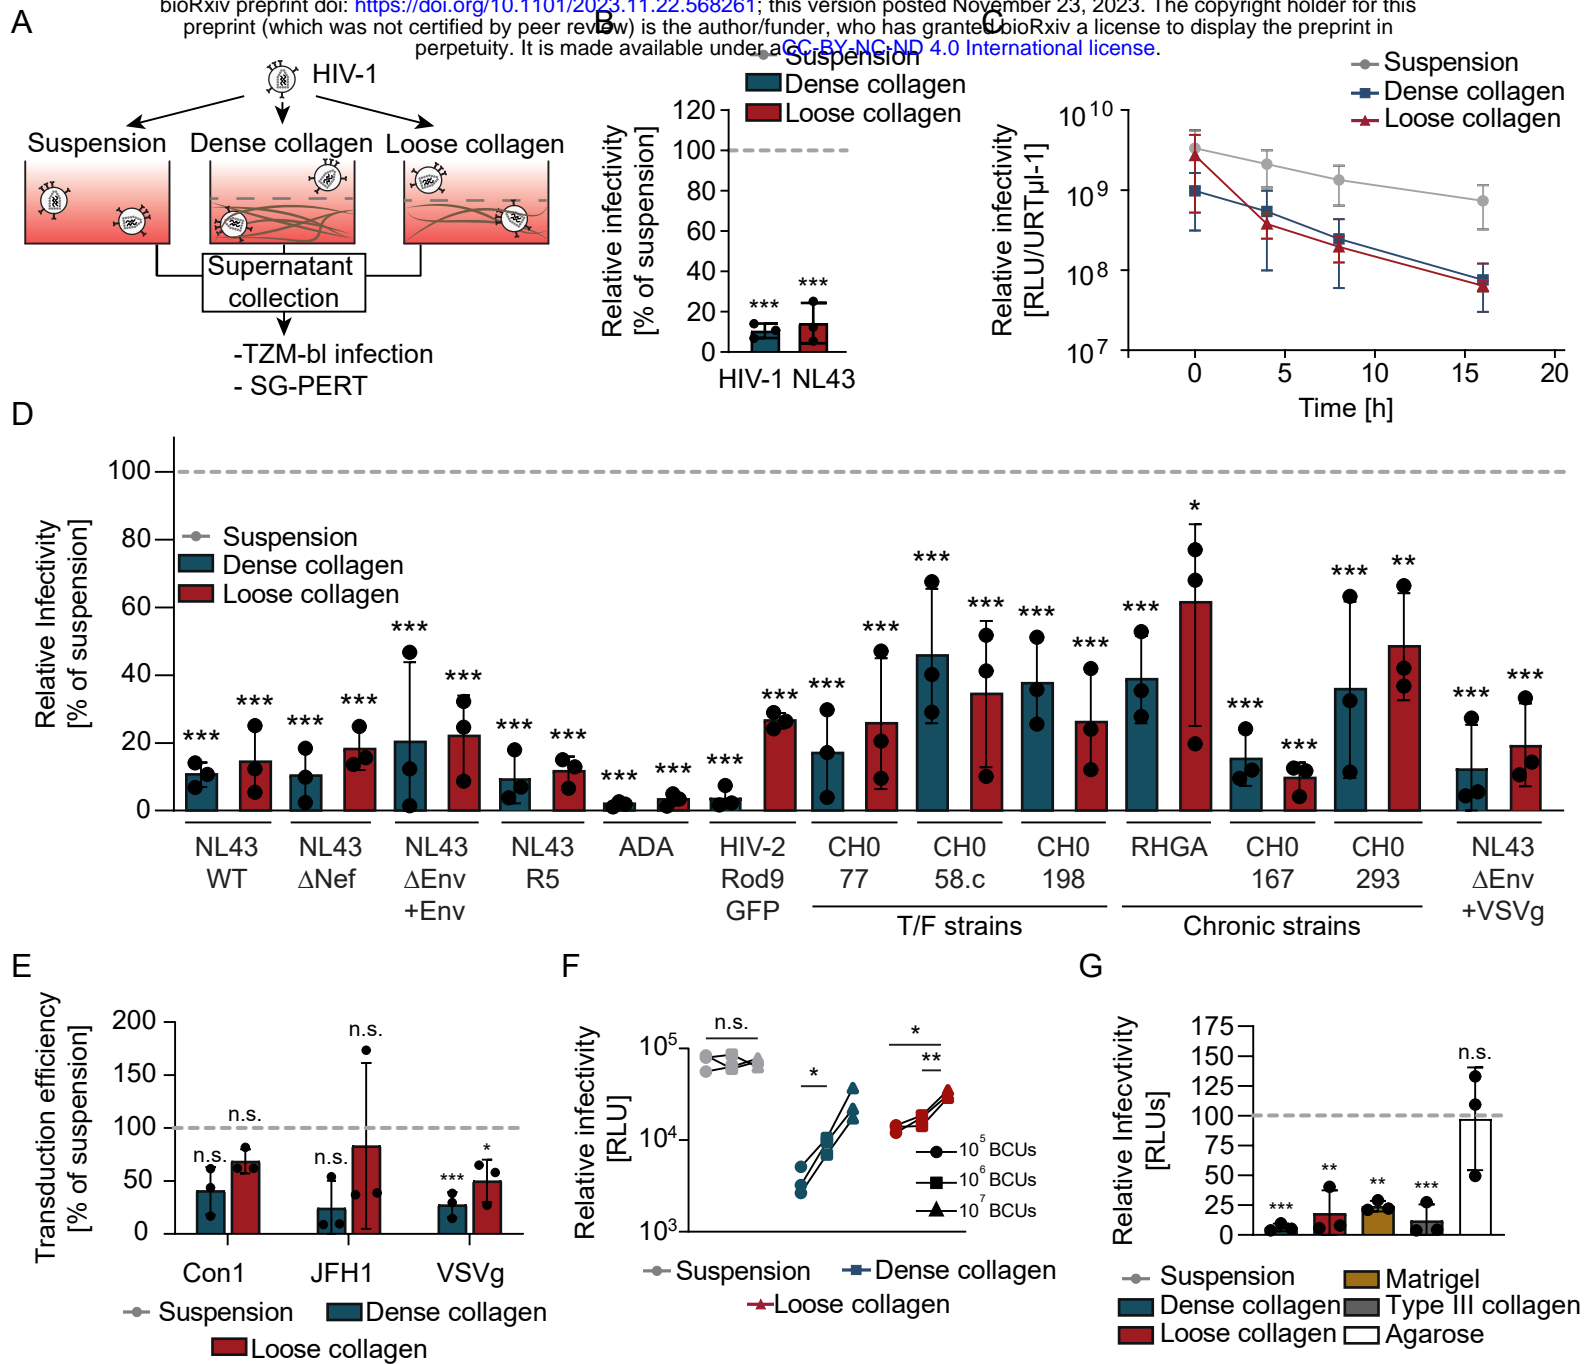

Fig. 1: Sid Ahmed et al, 2023

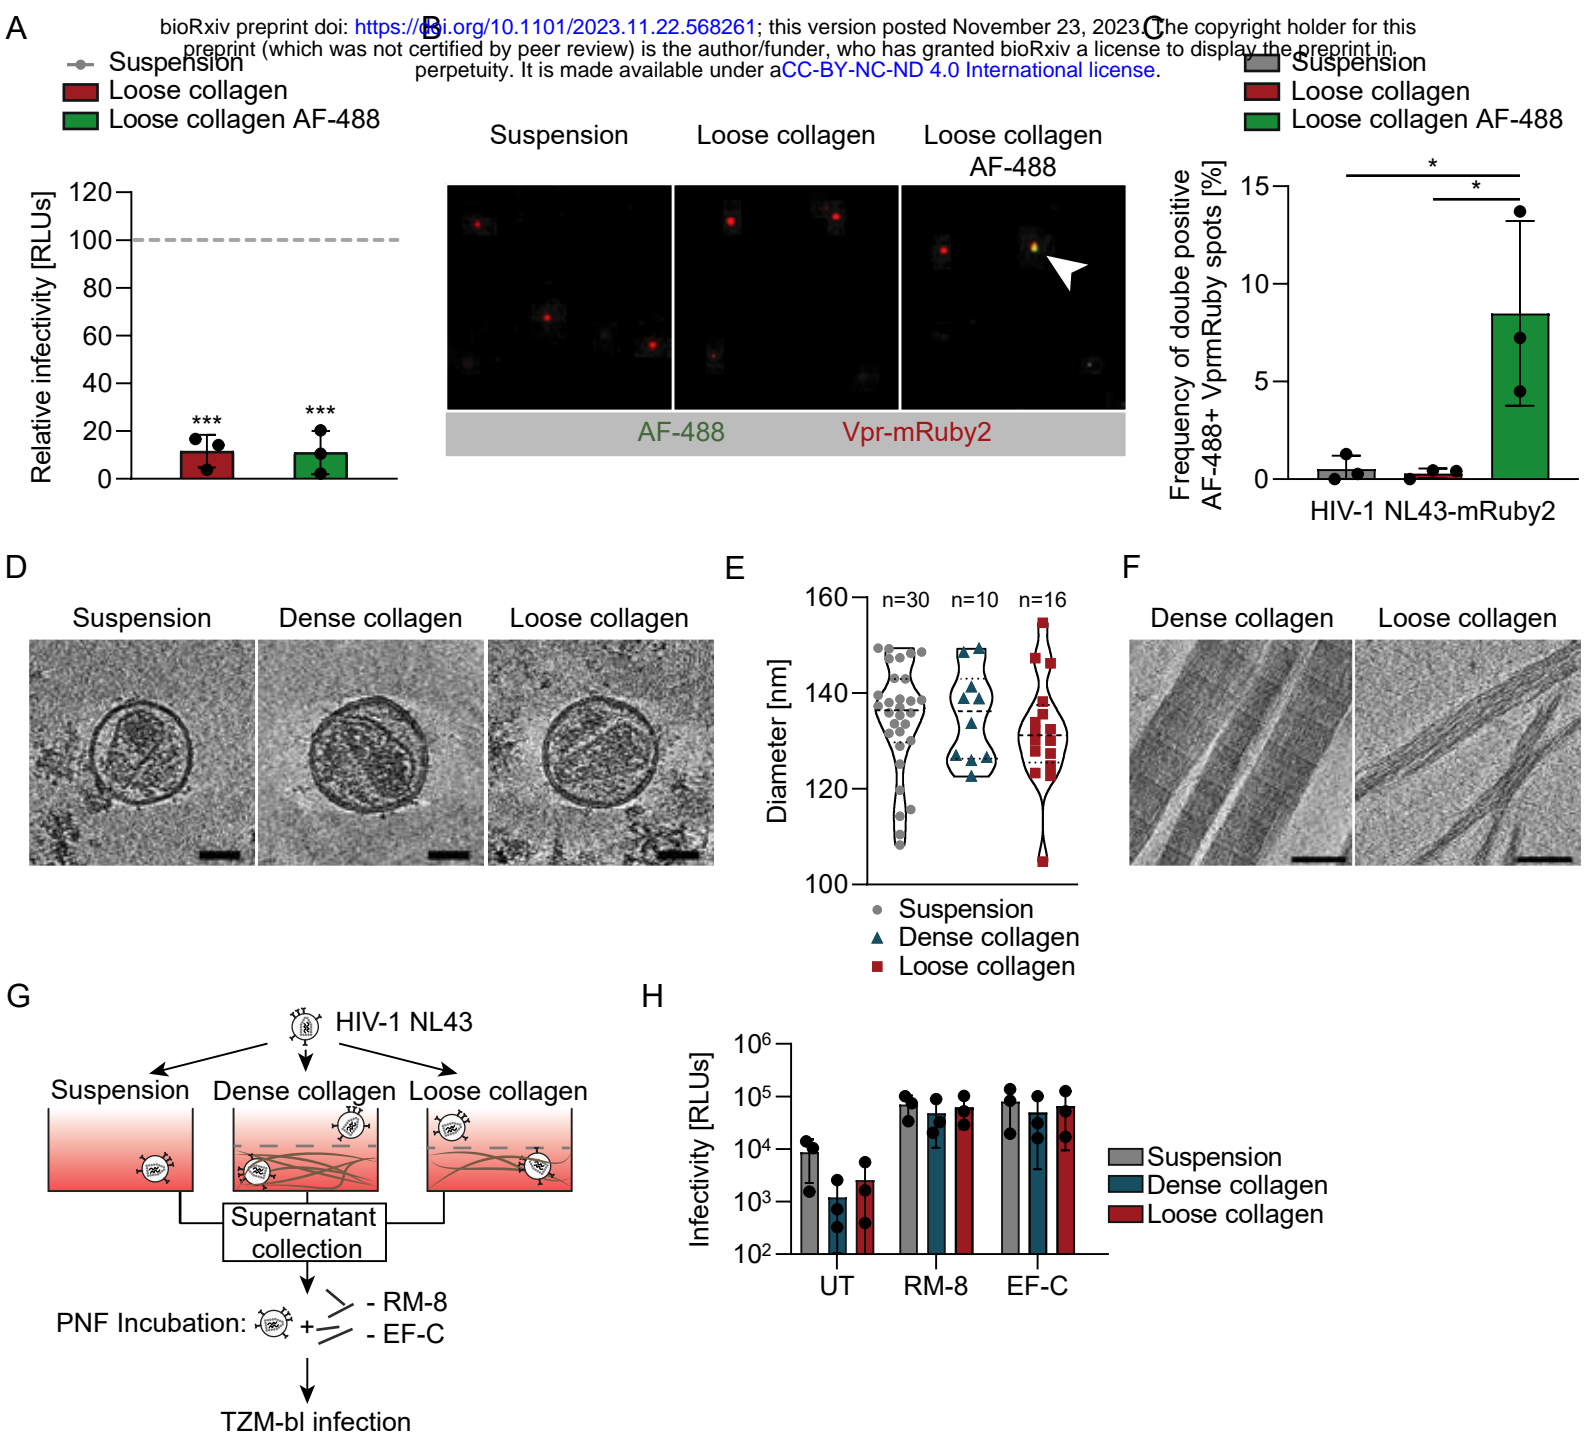

Fig. 2: Sid Ahmed et al, 2023

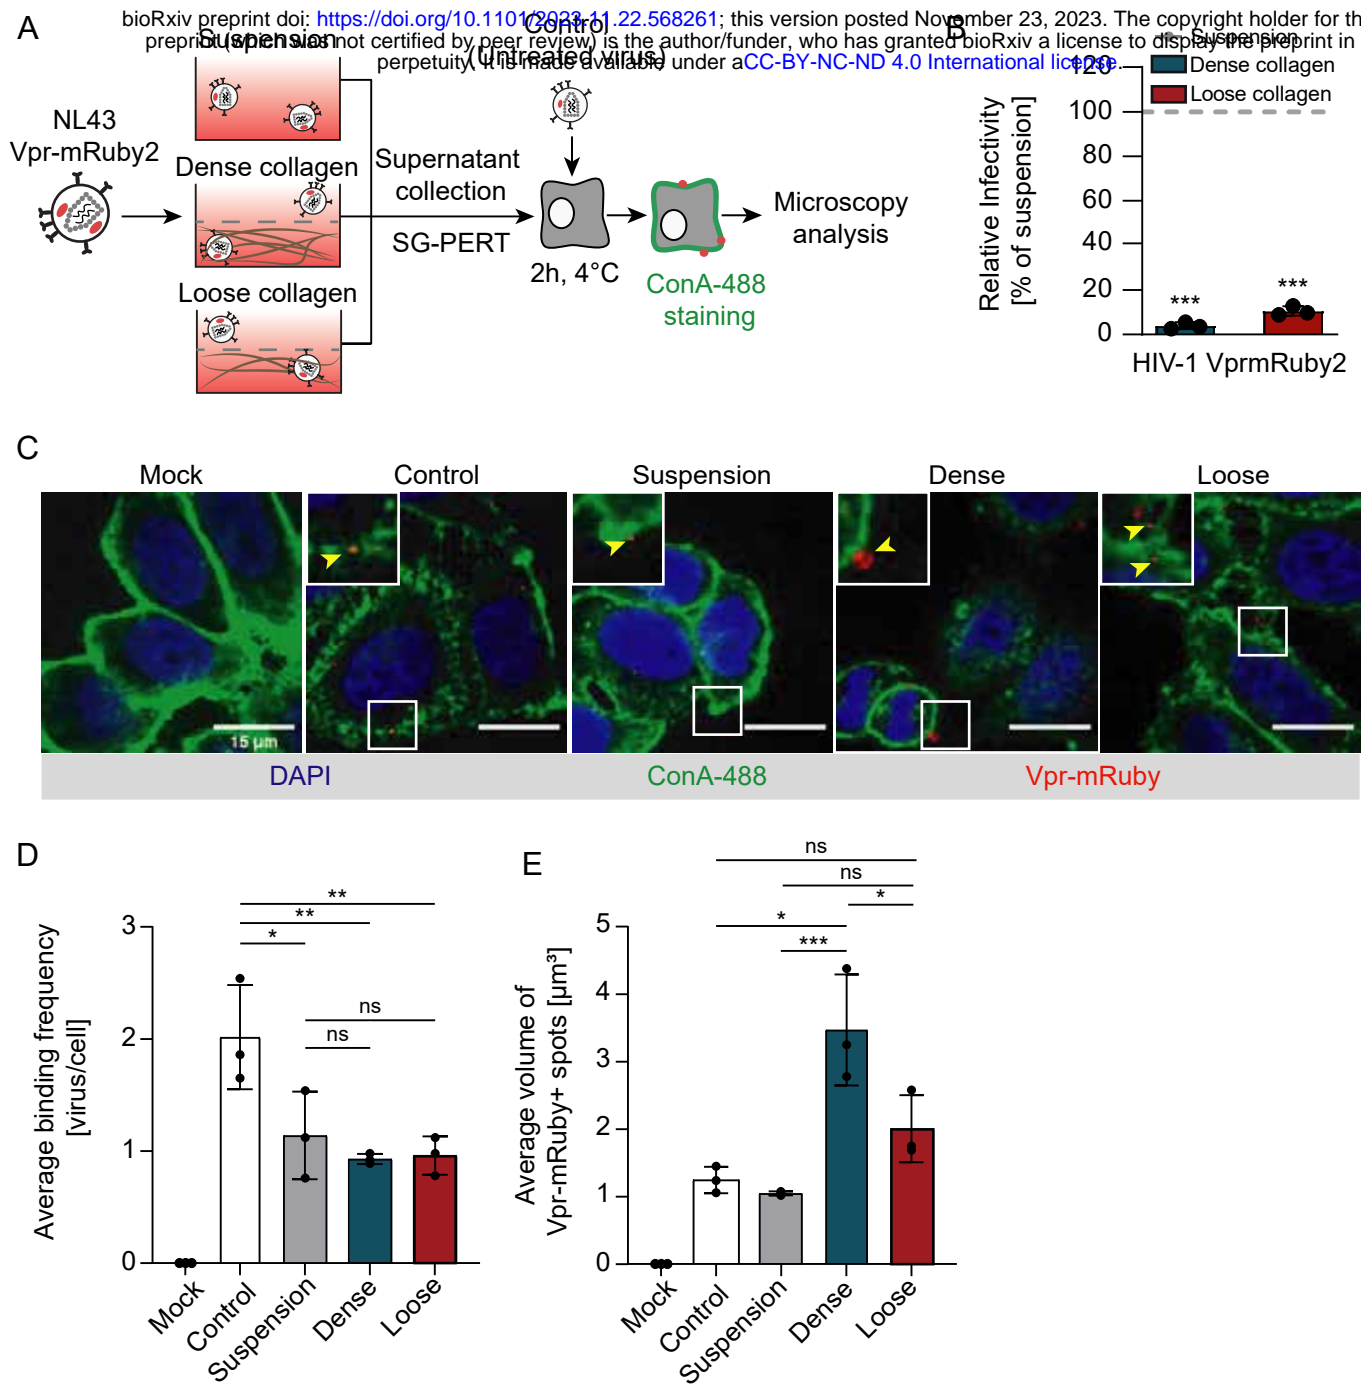

Fig. 3: Sid Ahmed et al, 2023

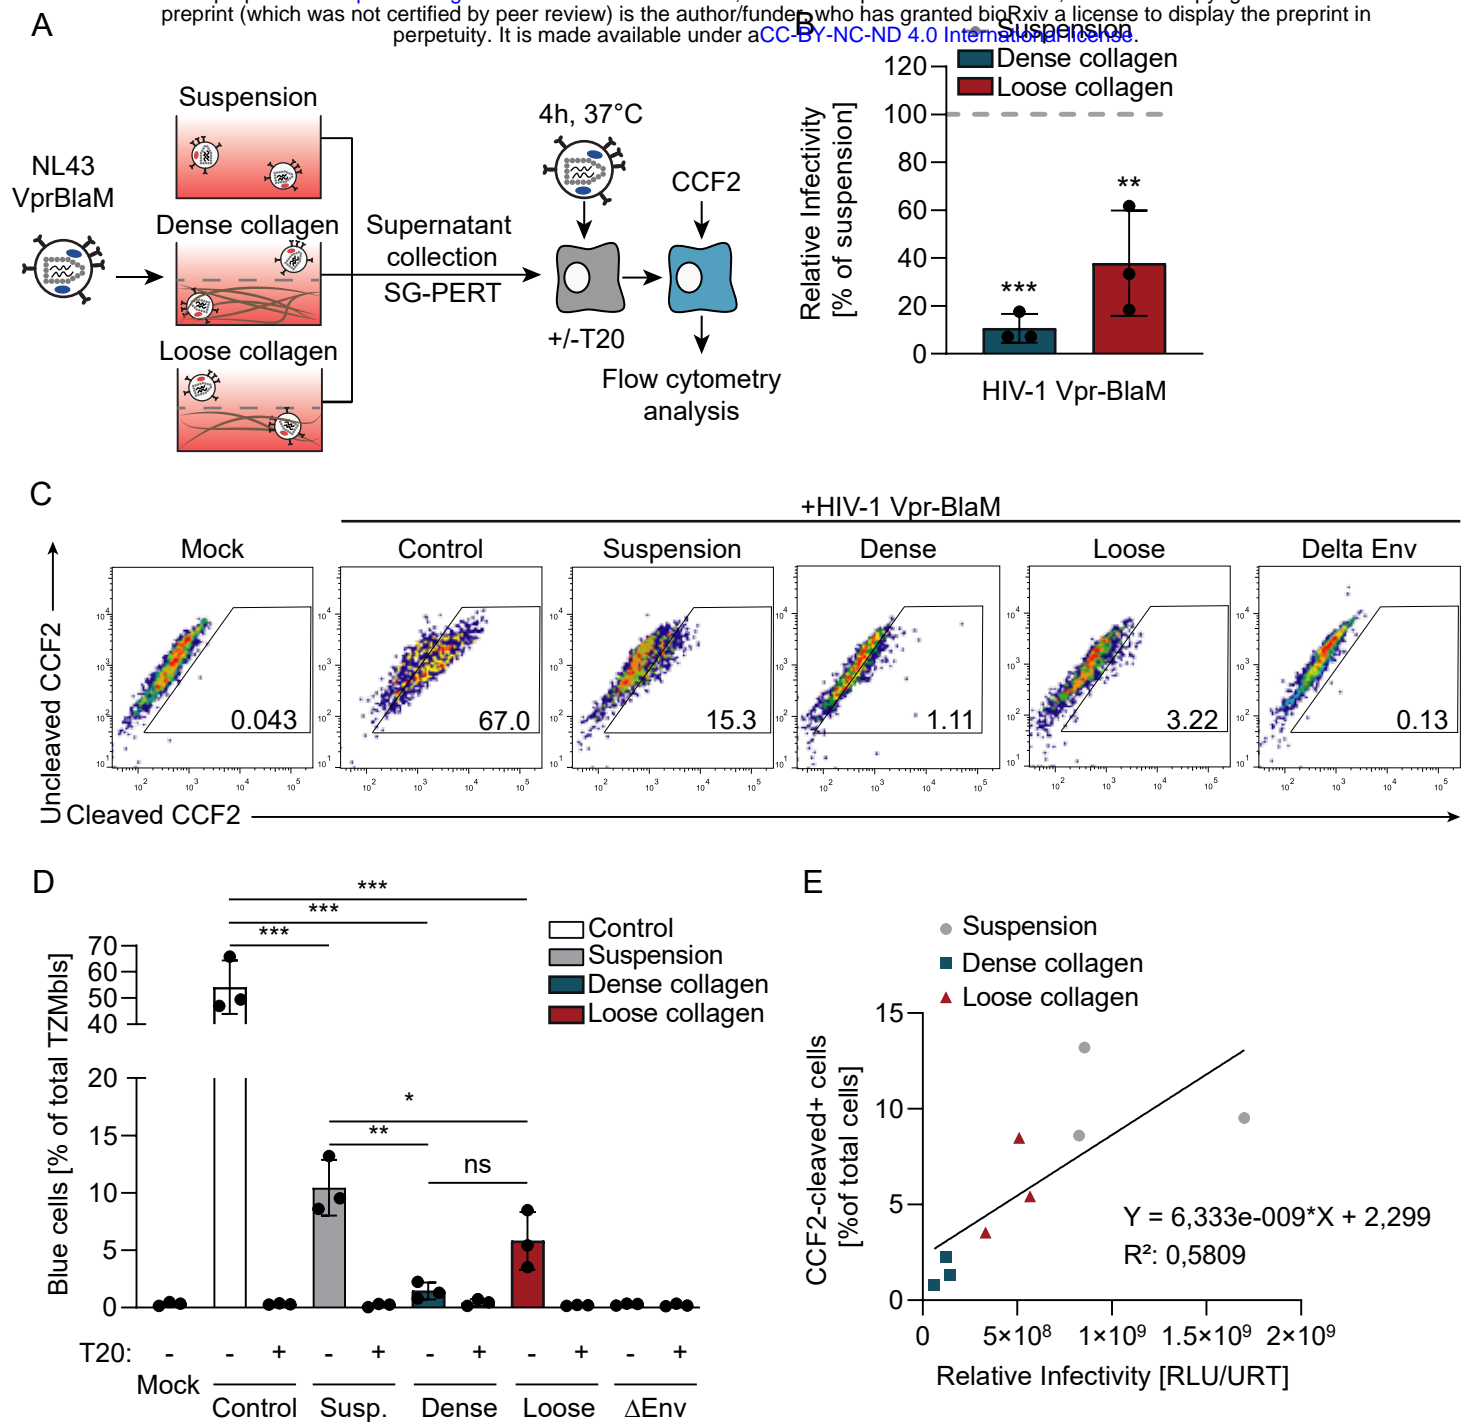

Fig. 4: Sid Ahmed et al, 2023

A

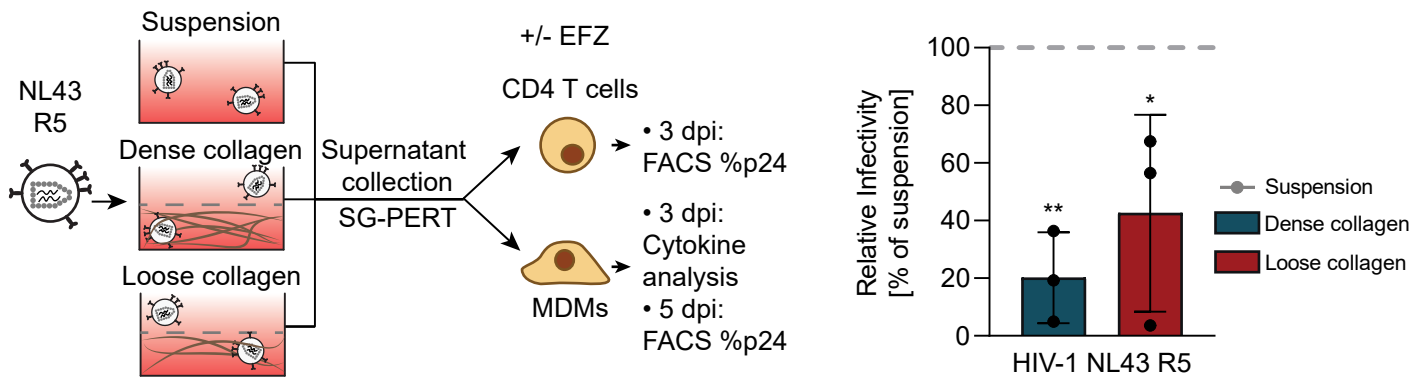

C

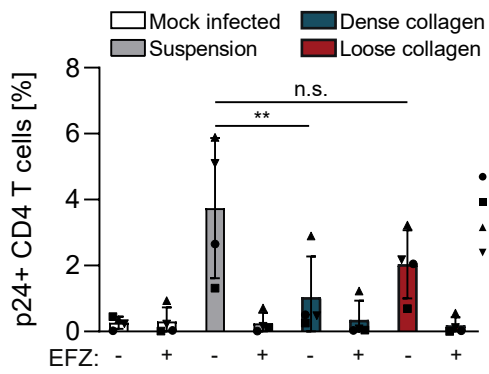

D

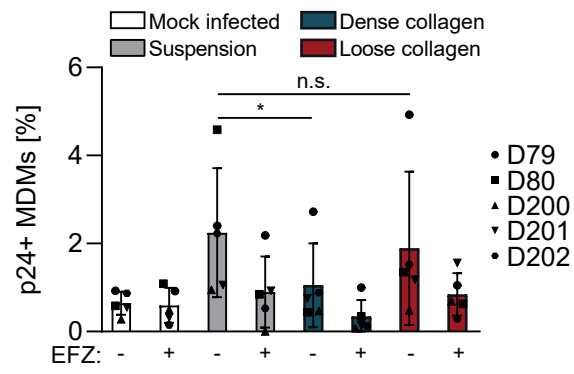

E

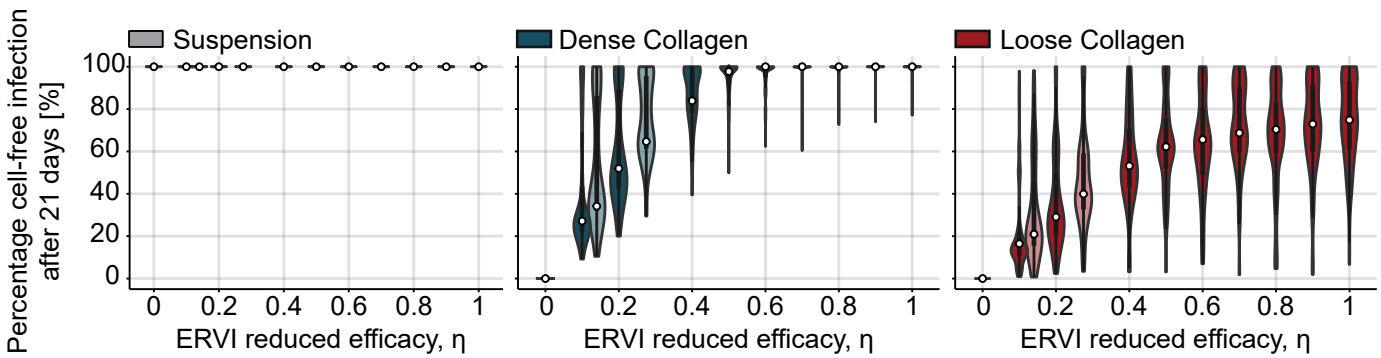

Fig. 5: Sid Ahmed et al, 2023



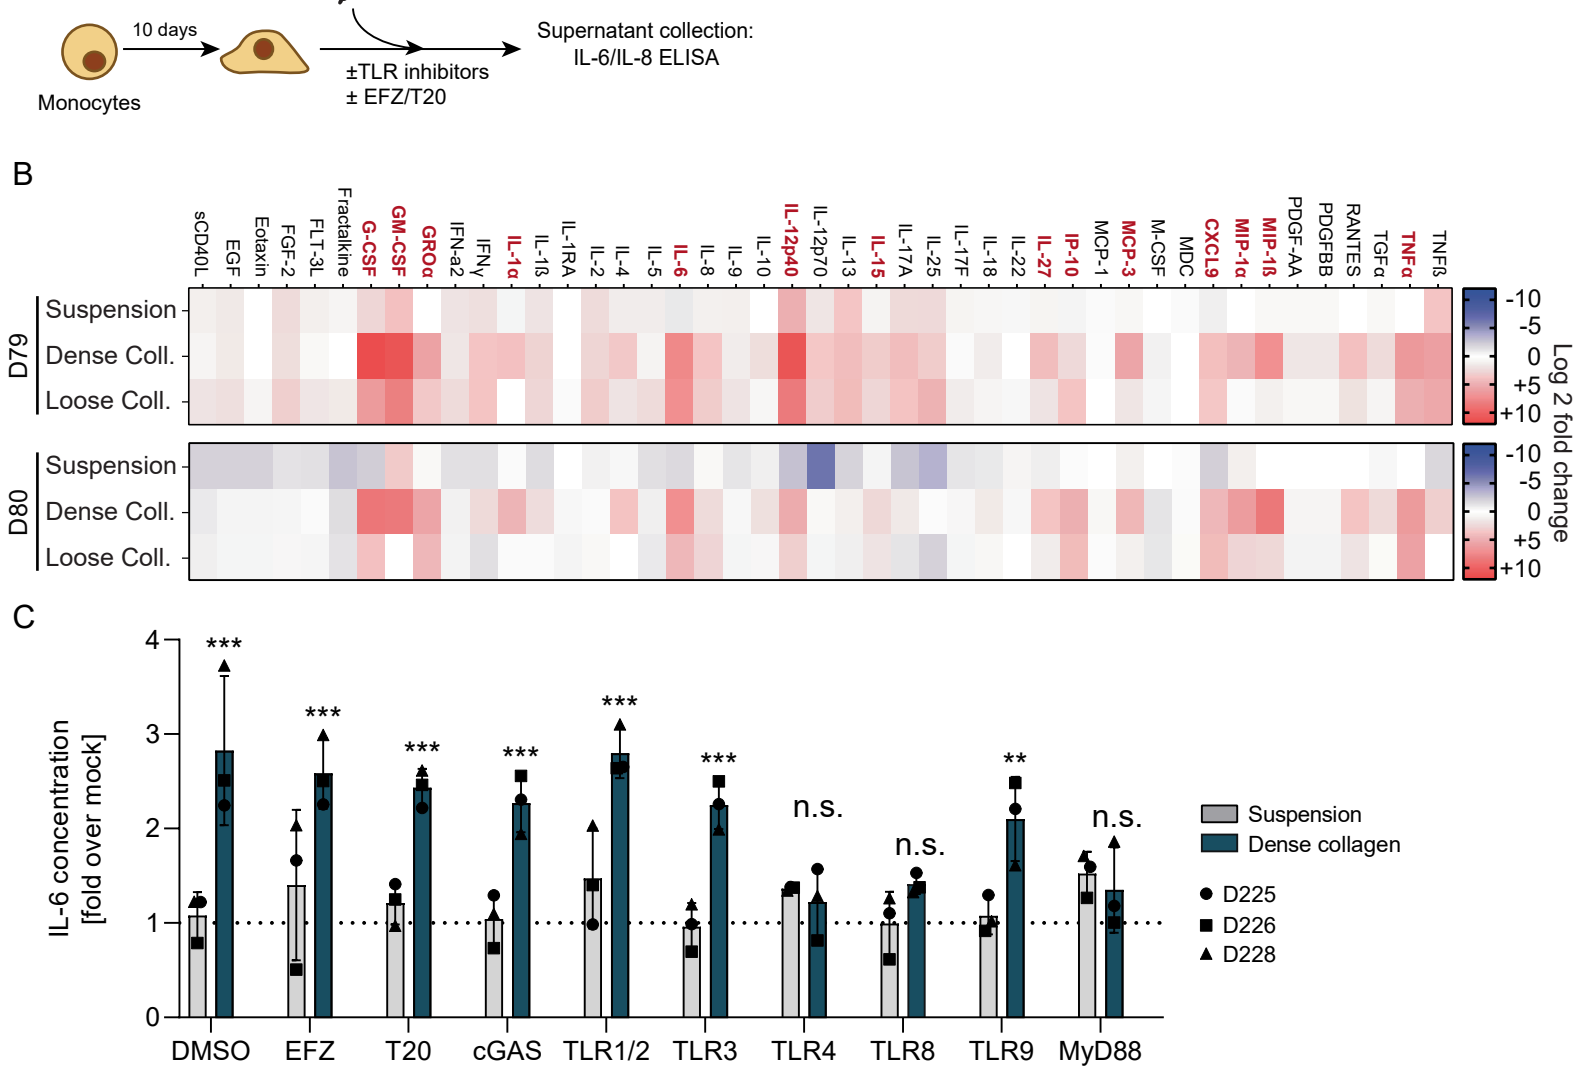

Fig. 6: Sid Ahmed et al, 2023

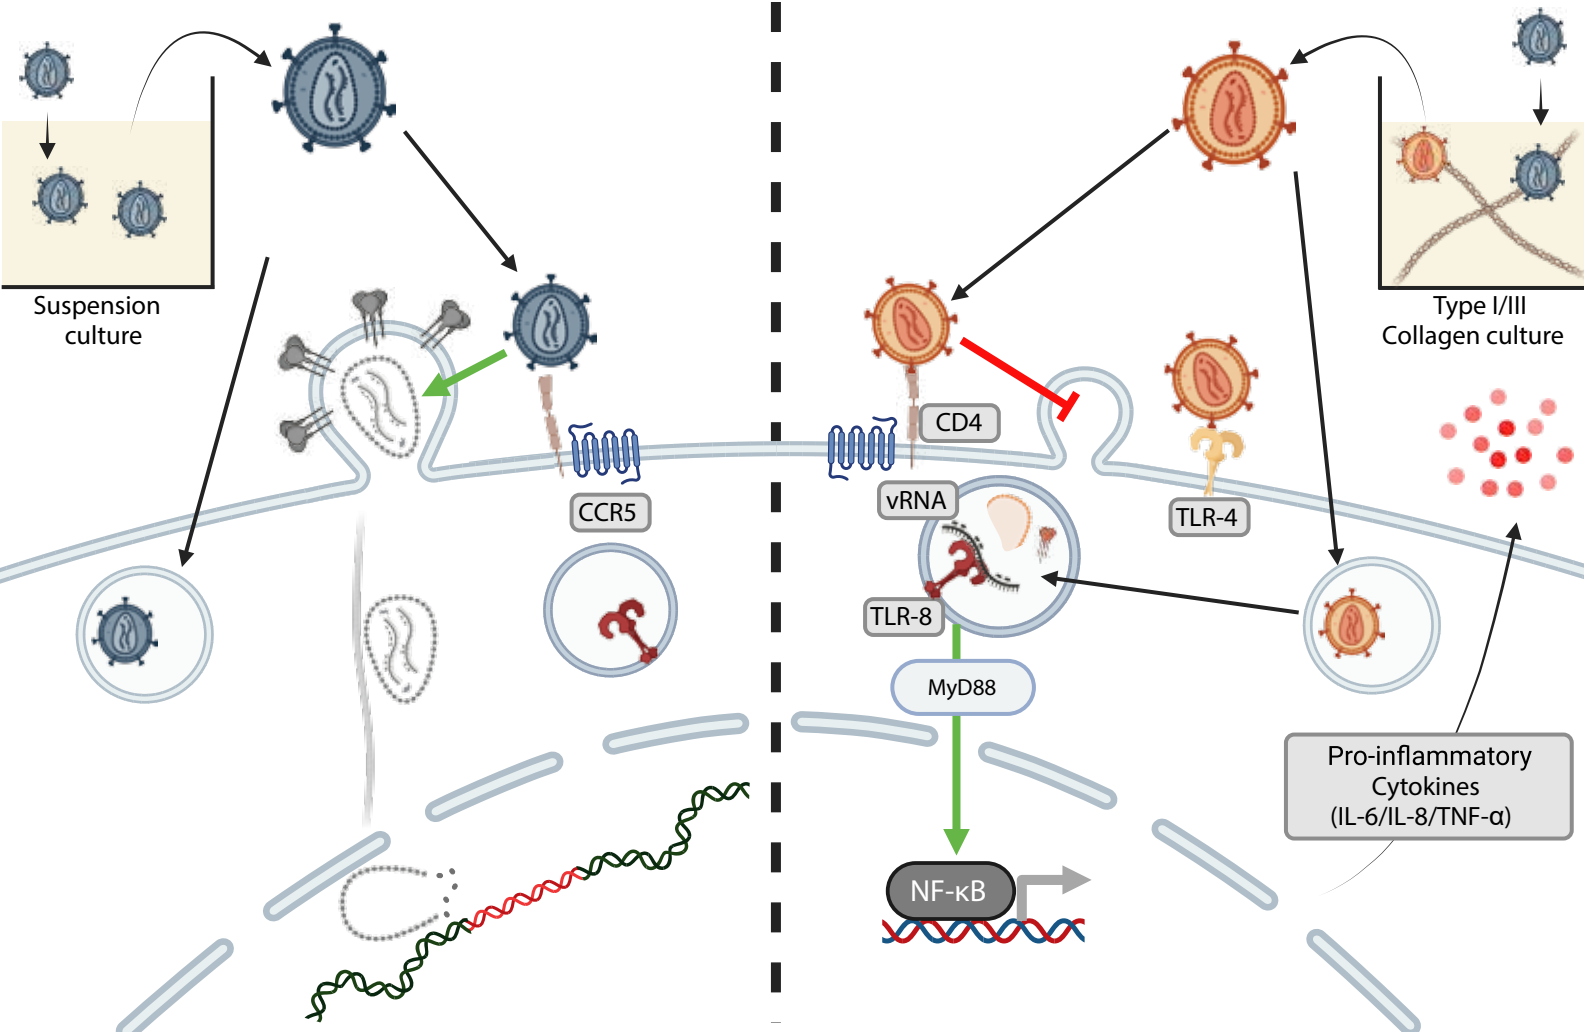

Fig. 7: Sid Ahmed et al, 2023

A

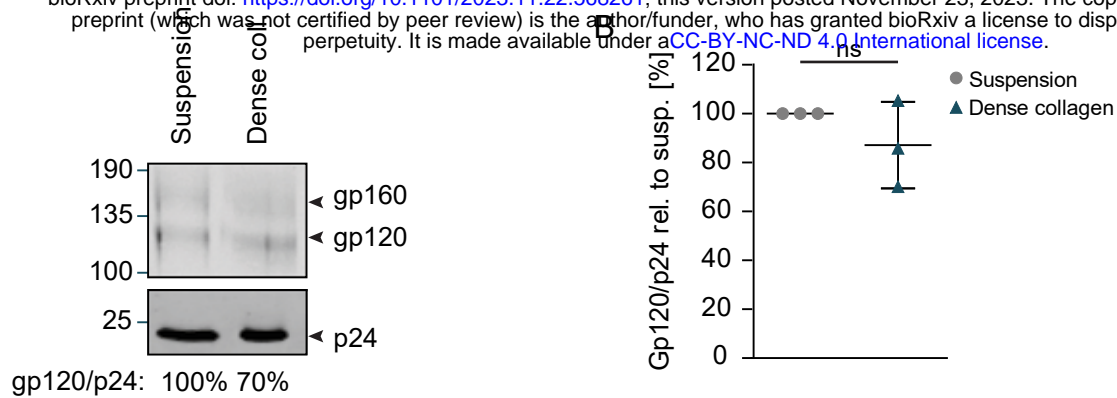

C

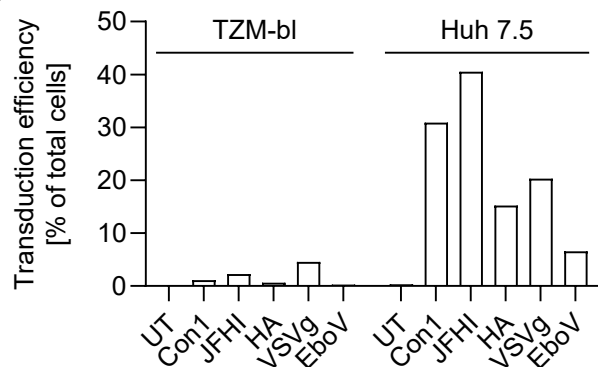

D

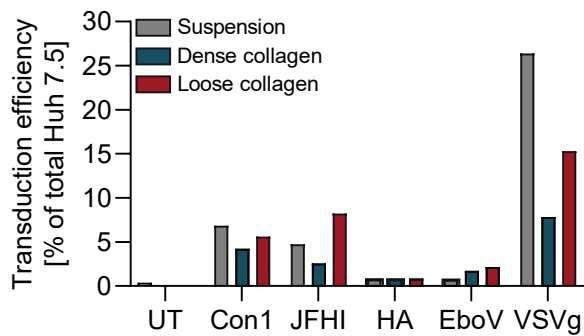

E

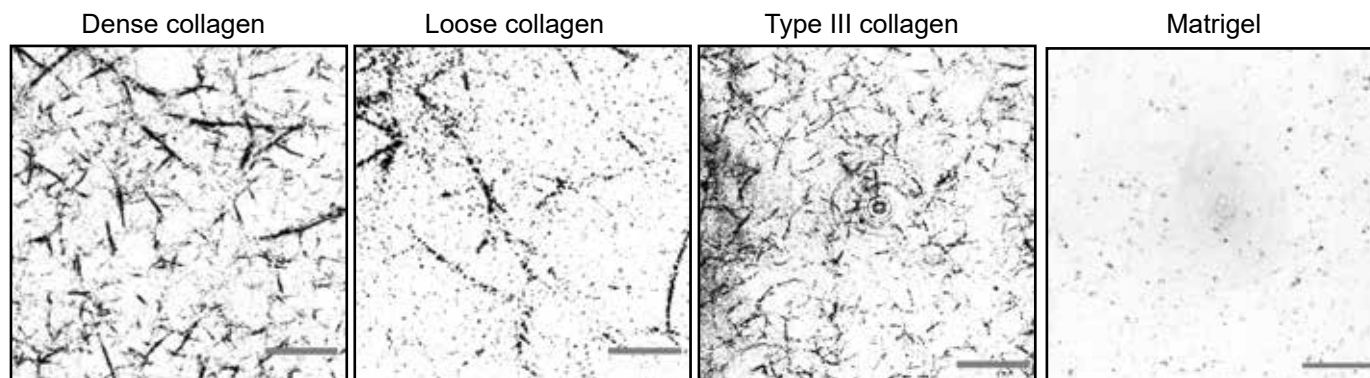

A

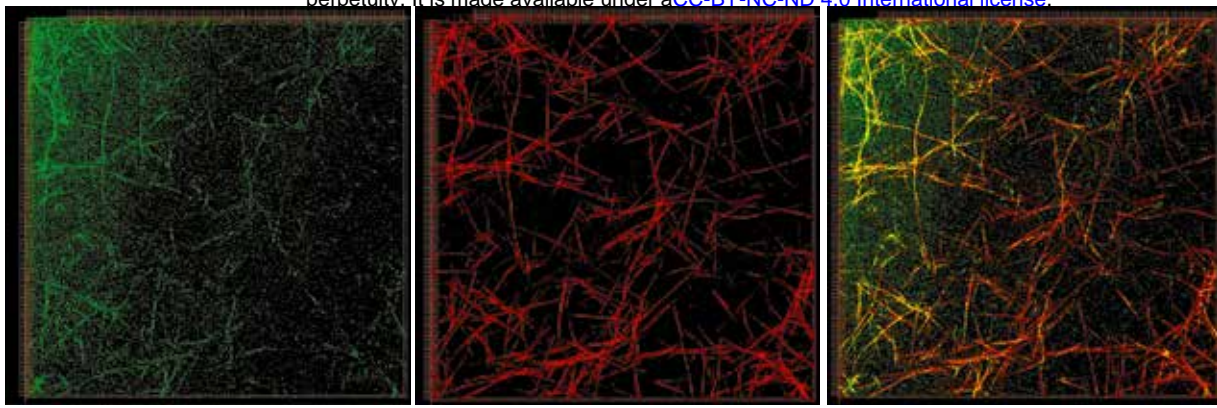

B

Dense collagen fibers

Loose collagen fibers

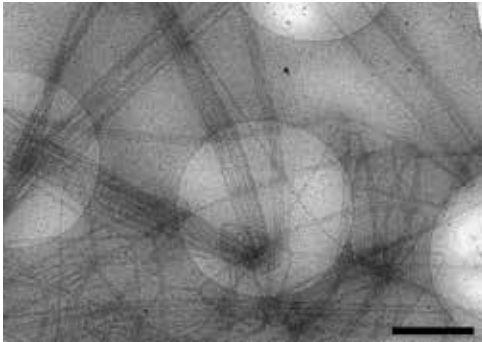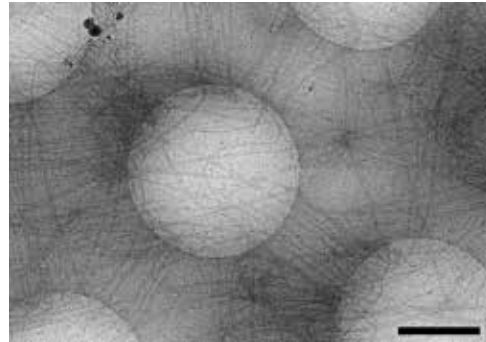

Extended View 2: Sid Ahmed et al, 2023

Raw Data

Virus segmentation

Cell membrane segmentation

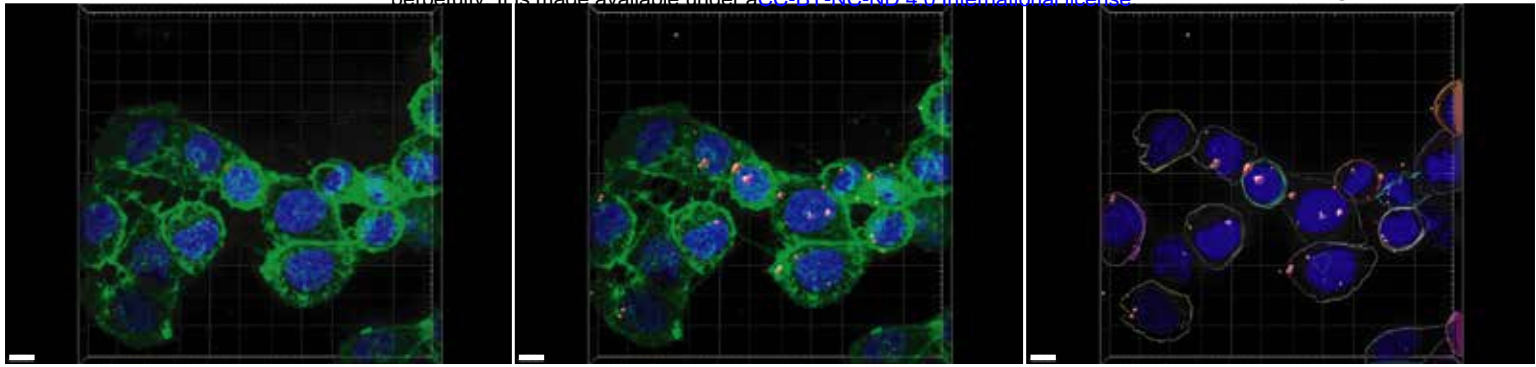

Extended View 3: Sid Ahmed et al, 2023

A

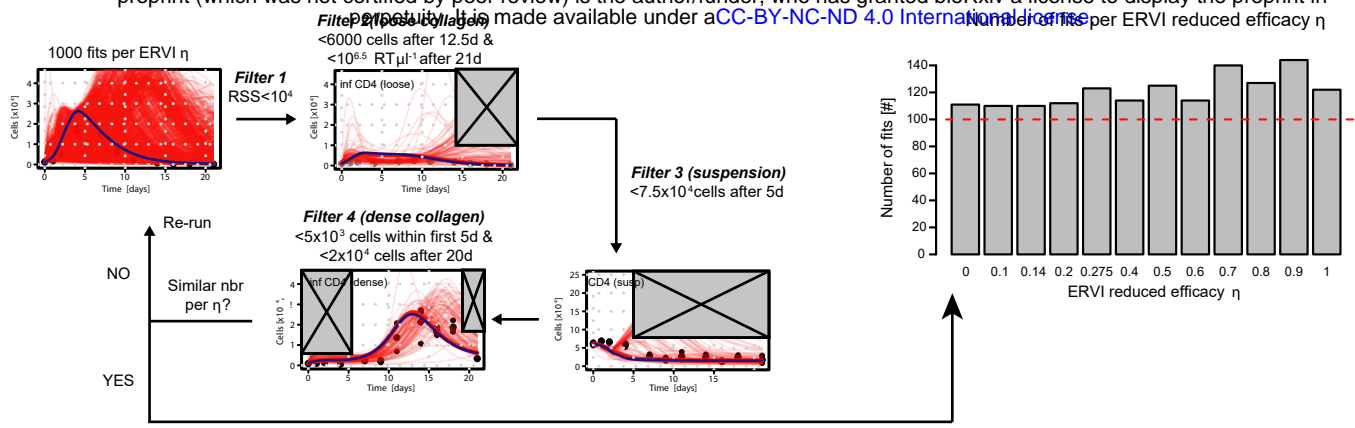

C

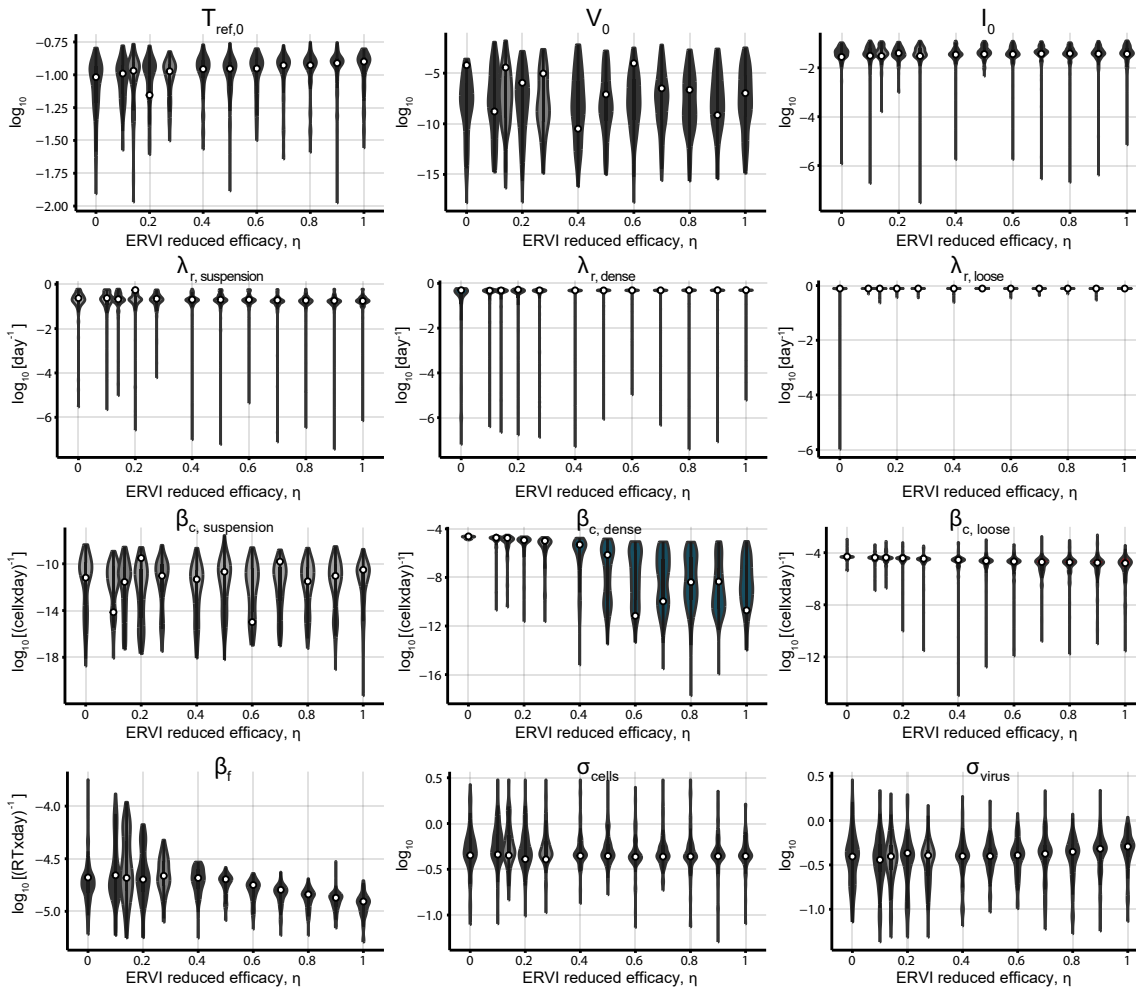

Extended View 4: Sid Ahmed et al, 2023

A

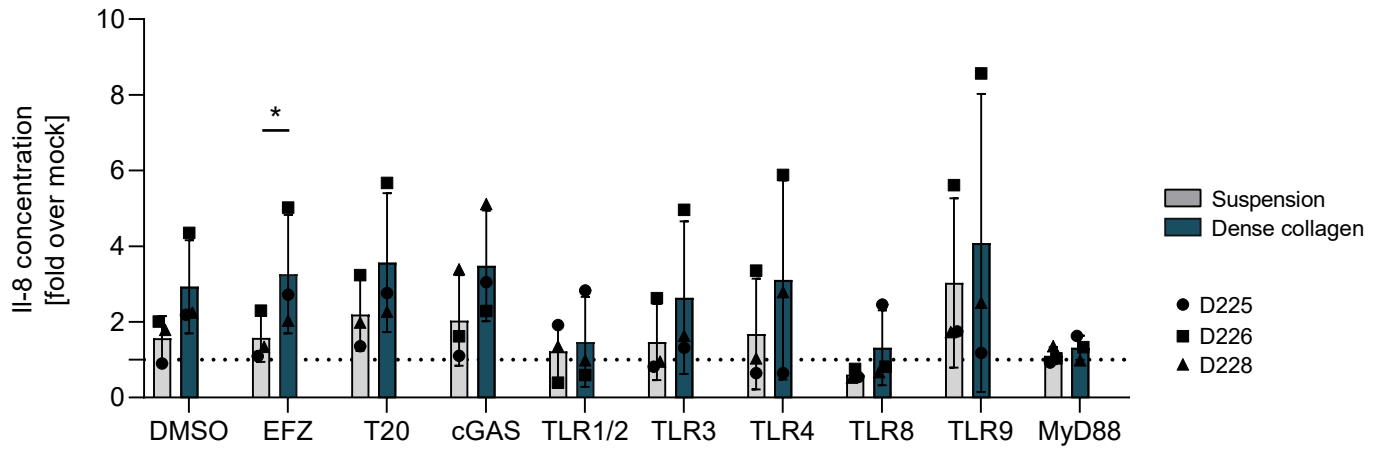

Extended View 5: Sid Ahmed et al, 2023
